# Supplementary material
Source: PubMed Central journal article supplement (PMC3338887)
Supplement: NIHMS362750-supplement-1_si_001.pdf [file NIHMS362750-supplement-1_si_001.pdf]

## Supporting Information

### **Waikialoid A Suppresses Hyphal Morphogenesis and Inhibits Biofilm Development in Pathogenic *Candida albicans***

Xiaoru Wang,<sup>†,‡</sup> Jianlan You,<sup>†,‡</sup> Jarrod B. King,<sup>†</sup> Douglas R. Powell,<sup>§</sup> Robert H. Cichewicz<sup>\*,†,⊥</sup>

*Natural Products Discovery Group, Department of Chemistry and Biochemistry,  
Stephenson Life Sciences Research Center 101 Stephenson Parkway, Room 1000,  
University of Oklahoma, Norman, Oklahoma, 73019-5251, USA.*

*Ecology and Evolutionary Biology Program, University of Oklahoma, Norman,  
Oklahoma, 73019-5251, USA.*

<sup>†</sup>Natural Products Discovery Group, Department of Chemistry and Biochemistry.

<sup>‡</sup>These authors contributed equally to this work.

<sup>§</sup>Department of Chemistry and Biochemistry.

<sup>⊥</sup>Ecology and Evolutionary Biology Program.

**Scheme S1.** Structures of compounds **2-14**

**Scheme S2.** Interconversion of avrainvillamide (**7**) and stephacidin B (**17**)

**Table S1.** Crystal data and structure refinement for waikialoid A (**1**)

**Table S2.** Crystal data and structure refinement for waikialide A (**15**)

**Table S3.** Sequence of large-ribosomal-subunit ITS1 region of the rDNA gene

**Figure S1.** LC-MS profiles of extracts prepared for the Hawaiian *Aspergillus* sp. isolate.

**Figure S2.** HRESIMS of waikialoid A (**1**).

**Figure S3.** <sup>1</sup>H-NMR spectrum (500 MHz, CDCl<sub>3</sub>) of waikialoid A (**1**).

**Figure S4.** <sup>13</sup>C-NMR spectrum (100 MHz, CDCl<sub>3</sub>) of waikialoid A (**1**).

**Figure S5.** HSQC-NMR spectrum (500 MHz, CDCl<sub>3</sub>) of waikialoid A (**1**).

**Figure S6.** HMBC-NMR spectrum (500 MHz, CDCl<sub>3</sub>) of waikialoid A (**1**).

**Figure S7.** COSY-NMR spectrum (500 MHz, CDCl<sub>3</sub>) of waikialoid A (**1**).

**Figure S8.** NOESY-NMR spectrum (500 MHz, CDCl<sub>3</sub>) of waikialoid A (**1**).

**Figure S9.** FTIR spectrum of waikialoid A (**1**).

**Figure S10.** CD spectrum of waikialoid A (**1**).

**Figure S11.** HRESIMS of waikialoid B (**14**).

**Figure S12.** <sup>1</sup>H-NMR spectrum (500 MHz, CDCl<sub>3</sub>) of waikialoid B (**14**).

**Figure S13.** HSQC-NMR spectrum (500 MHz, CDCl<sub>3</sub>) of waikialoid B (**14**).

**Figure S14.** HMBC-NMR spectrum (500 MHz, CDCl<sub>3</sub>) of waikialoid B (**14**).

**Figure S15.** COSY-NMR spectrum (500 MHz, CDCl<sub>3</sub>) of waikialoid B (**14**).

**Figure S16.** ROESY-NMR spectrum (500 MHz, CDCl<sub>3</sub>) of waikialoid B (**14**).

**Figure S17.** FTIR spectrum of waikialoid B (**14**).

**Figure S18.** CD spectrum of waikialoid B (**14**).

**Figure S19.** HRESIMS of waikialide A (**15**).

**Figure S20.**  $^1\text{H}$ -NMR spectrum (400 MHz,  $\text{CD}_3\text{OD}$ ) waikialide A (**15**).

**Figure S21.**  $^{13}\text{C}$ -NMR spectrum (100 MHz,  $\text{CD}_3\text{OD}$ ) waikialide A (**15**).

**Figure S22.** HSQC-NMR spectrum (400 MHz,  $\text{CD}_3\text{OD}$ ) waikialide A (**15**).

**Figure S23.** HMBC-NMR spectrum (400 MHz,  $\text{CD}_3\text{OD}$ ) waikialide A (**15**).

**Figure S24.** COSY-NMR spectrum (400 MHz,  $\text{CD}_3\text{OD}$ ) of waikialide A (**15**).

**Figure S25.** NOESY-NMR spectrum (400 MHz,  $\text{CD}_3\text{OD}$ ) of waikialide A (**15**).

**Figure S26.** FTIR spectrum of waikialide A (**15**).

**Figure S27.** ORTEP structure for **15** generated from the X-ray diffraction data.

**Figure S28.** CD spectrum of waikialide A (**15**).

**Figure S29.** Octant rule applied to waikialide A (**15**).

**Figure S30.**  $^1\text{H}$  -NMR (500 MHz, pyridine- $d_5$ ) of derivative of waikialide A (**15a**).

**Figure S31.**  $^1\text{H}$  -NMR (500 MHz, pyridine- $d_5$ ) of derivative of waikialide A (**15b**).

**Figure S32.** HRESIMS of waikialide B (**16**).

**Figure S33.**  $^1\text{H}$ -NMR spectrum (400 MHz,  $\text{CD}_3\text{OD}$ ) waikialide B (**16**).

**Figure S34.**  $^{13}\text{C}$ -NMR spectrum (100 MHz,  $\text{CD}_3\text{OD}$ ) waikialide B (**16**).

**Figure S35.** HSQC-NMR spectrum (400 MHz,  $\text{CD}_3\text{OD}$ ) waikialide B (**16**).

**Figure S36.** HMBC-NMR spectrum (400 MHz,  $\text{CD}_3\text{OD}$ ) waikialide B (**16**).

**Figure S37.** COSY-NMR spectrum (400 MHz,  $\text{CD}_3\text{OD}$ ) of waikialide B (**16**).

**Figure S38.** NOESY-NMR spectrum (400 MHz, CD<sub>3</sub>OD) of waikialide B (**16**).

**Figure S39.** <sup>1</sup>H-<sup>1</sup>H NOESY correlations (dashed double-headed arrows) used to corroborate the relative configuration of the substructure in metabolite **16**.

**Figure S40.** FTIR spectrum of waikialide B (**16**).

**Figure S41.** Effects of compounds **1** and **15** on *Candida albicans* hyphae formation.

**Figure S42.** Time of addition assay of compound **1** (3 μM).

**Figure S43.** Time of addition assay of compound **1** (25 μM).

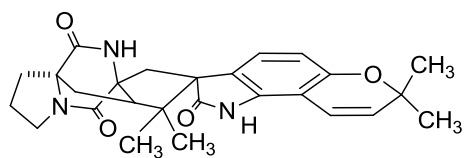

**2** notoamide B

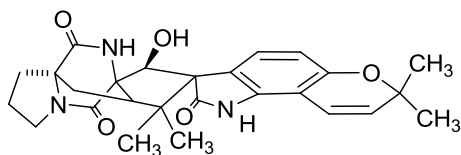

**3** sclerotiamide

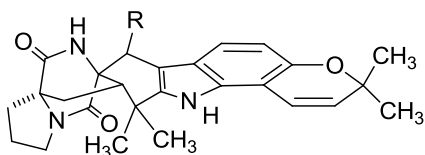

**4** notoamide F R = OCH<sub>3</sub>  
**5** notoamide R R = OH

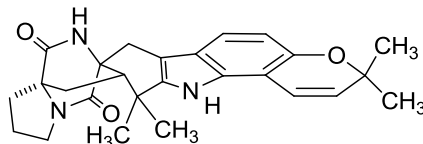

**6** stephacidin A

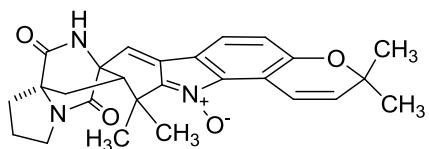

**7** avrainvillamide

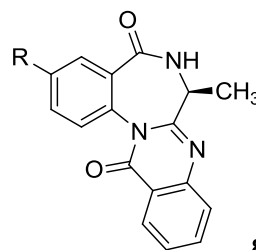

**8** circumdatin C R = OH  
**9** circumdatin F R = H

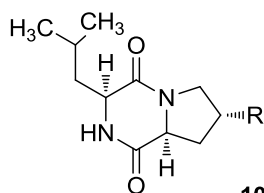

**10** R = H  
**11** R = OH

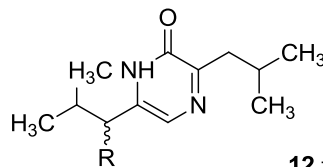

**12** flavacol R = H  
**13** R = OH

**Scheme S1.** Structures of compound **2-14**

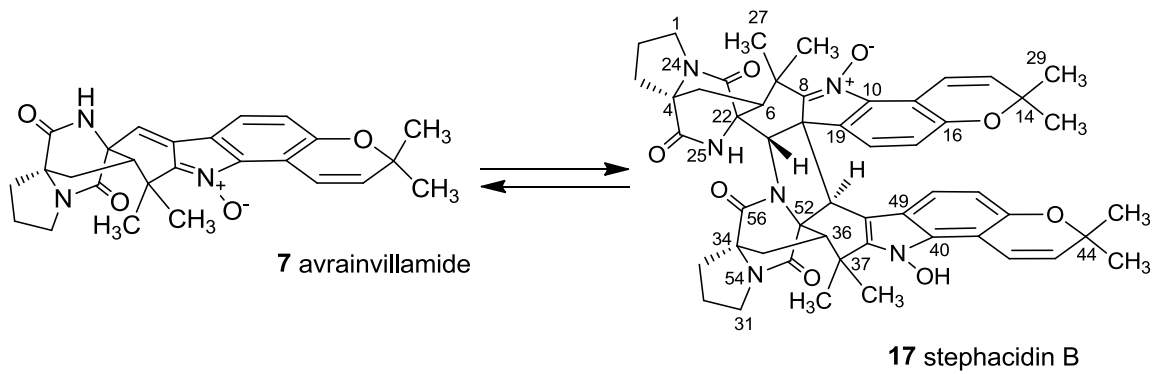

**Scheme S2.** Interconversion of avrainvillamide (**7**) and stephacidin B (**17**)

**Table S1.** Crystal data and structure refinement for waikialoid A (1)

---

|                                    |                                                                                                                                                                 |
|------------------------------------|-----------------------------------------------------------------------------------------------------------------------------------------------------------------|
| Empirical formula                  | $(C_{52} H_{54} N_6 O_7) \cdot (H_2 O) \cdot (C H_4 O)$<br>$C_{53} H_{60} N_6 O_9$                                                                              |
| Formula weight                     | 925.07                                                                                                                                                          |
| Crystal system                     | Monoclinic                                                                                                                                                      |
| Space group                        | $P2_1$                                                                                                                                                          |
| Unit cell dimensions               | $a = 10.6276(4) \text{ \AA}$ $\alpha = 90^\circ$<br>$b = 17.6706(6) \text{ \AA}$ $\beta = 104.187(2)^\circ$<br>$c = 12.8917(4) \text{ \AA}$ $\gamma = 90^\circ$ |
| Volume                             | $2347.17(14) \text{ \AA}^3$                                                                                                                                     |
| Z, Z'                              | 2, 1                                                                                                                                                            |
| Density (calculated)               | $1.309 \text{ Mg/m}^3$                                                                                                                                          |
| Wavelength                         | $1.54178 \text{ \AA}$                                                                                                                                           |
| Temperature                        | $100(2) \text{ K}$                                                                                                                                              |
| $F(000)$                           | 984                                                                                                                                                             |
| Absorption coefficient             | $0.731 \text{ mm}^{-1}$                                                                                                                                         |
| Absorption correction              | Semi-empirical from equivalents                                                                                                                                 |
| Max. and min. transmission         | 0.8418 and 0.6520                                                                                                                                               |
| Theta range for data collection    | $3.54$ to $67.16^\circ$                                                                                                                                         |
| Reflections collected              | 67703                                                                                                                                                           |
| Independent reflections            | 7859 [ $R(\text{int}) = 0.0272$ ]                                                                                                                               |
| Data / restraints / parameters     | 7859 / 21 / 635                                                                                                                                                 |
| $wR$ ( $F^2$ all data)             | $wR2 = 0.0845$                                                                                                                                                  |
| $R(F$ obsd data)                   | $R1 = 0.0316$                                                                                                                                                   |
| Goodness-of-fit on $F^2$           | 1.005                                                                                                                                                           |
| Observed data [ $I > 2\sigma(I)$ ] | 7855                                                                                                                                                            |
| Absolute structure parameter       | 0.05(11)                                                                                                                                                        |
| Largest and mean shift / s.u.      | 0.033 and 0.001                                                                                                                                                 |
| Largest diff. peak and hole        | 0.343 and $-0.281 \text{ e/\AA}^3$                                                                                                                              |

---

**Table S2.** Crystal data and structure refinement for waikialide A (15)

---

|                                   |                                                                                              |
|-----------------------------------|----------------------------------------------------------------------------------------------|
| Empirical formula                 | C <sub>14</sub> H <sub>20</sub> O <sub>2</sub>                                               |
| Formula weight                    | 220.30                                                                                       |
| Crystal system                    | Monoclinic                                                                                   |
| Space group                       | P2 <sub>1</sub>                                                                              |
| Unit cell dimensions              | a = 7.274(8) Å     α = 90°<br>b = 5.066(6) Å     β = 98.53(3)°<br>c = 17.43(2) Å     γ = 90° |
| Volume                            | 635.2(13) Å <sup>3</sup>                                                                     |
| Z, Z'                             | 2, 1                                                                                         |
| Density (calculated)              | 1.152 Mg/m <sup>3</sup>                                                                      |
| Wavelength                        | 0.71073 Å                                                                                    |
| Temperature                       | 100(2) K                                                                                     |
| F(000)                            | 240                                                                                          |
| Absorption coefficient            | 0.075 mm <sup>-1</sup>                                                                       |
| Absorption correction             | Semi-empirical from equivalents                                                              |
| Max. and min. transmission        | 0.9970 and 0.9613                                                                            |
| Theta range for data collection   | 2.36 to 22.99°                                                                               |
| Reflections collected             | 4287                                                                                         |
| Independent reflections           | 1000 [R (int) = 0.1127]                                                                      |
| Data / restraints / parameters    | 1000 / 1 / 150                                                                               |
| wR(F <sup>2</sup> all data)       | wR2 = 0.1720                                                                                 |
| R(F obsd data)                    | R1 = 0.0710                                                                                  |
| Goodness-of-fit on F <sup>2</sup> | 1.051                                                                                        |
| Observed data [I > 2σ (I)]        | 730                                                                                          |
| Absolute structure parameter      | -3(5)                                                                                        |
| Largest and mean shift / s.u.     | 0.000 and 0.000                                                                              |
| Largest diff. peak and hole       | 0.227 and -0.257 e/Å <sup>3</sup>                                                            |

---



**Table S3.** Sequence of large-ribosomal-subunit ITS1 region of the rDNA gene

ATTGNTCCTCCNGATCGAGGGTCACCTGATGAAATAGATTGGTTGCTTTTCAGCGTCCGCCAG  
CAGCCGGCCGGGCCTACAAGAGCGGGTGACAAAGCCCCATACGCTCGAGGACCGGACGCGGT  
GCCGCCGCTGCCTTTCGGGCCCGTCCCCGGGGGGGGGACGACGCCAACACACAAGCCGT  
GCTTGAGGGCAGCAATGACGCTCGGACAGGCATACCCCCGGAATACCAGGGGGTGCAATGT  
GCGTCAAAGACTCGATGATTCACTGAATTCTGCAATTCACATTAATTATCGCATTTTCGCTGCG  
TTCTTCATCGATGCCGGAACCAAGAGATCCATTGTTGAAAGTTTAACTGATTGCGATAACAAT  
CGACTCAGACGACAAAACCTTCAGACAGTGTTACGTTGGTGTCTCCGGCGAGCGCTGTGCCAC  
CCCTAAGGAAGGGGGCGGGCTCGCCGAAGCAACAAGGTACGGTATACACGGGTGGGAGGTT  
GGGCCCCGAGGGACCCTCACTCAGTAATGATCCTTCCGCAGGTCNCCNTTACGGAAGGGNNN  
NNNNNNN

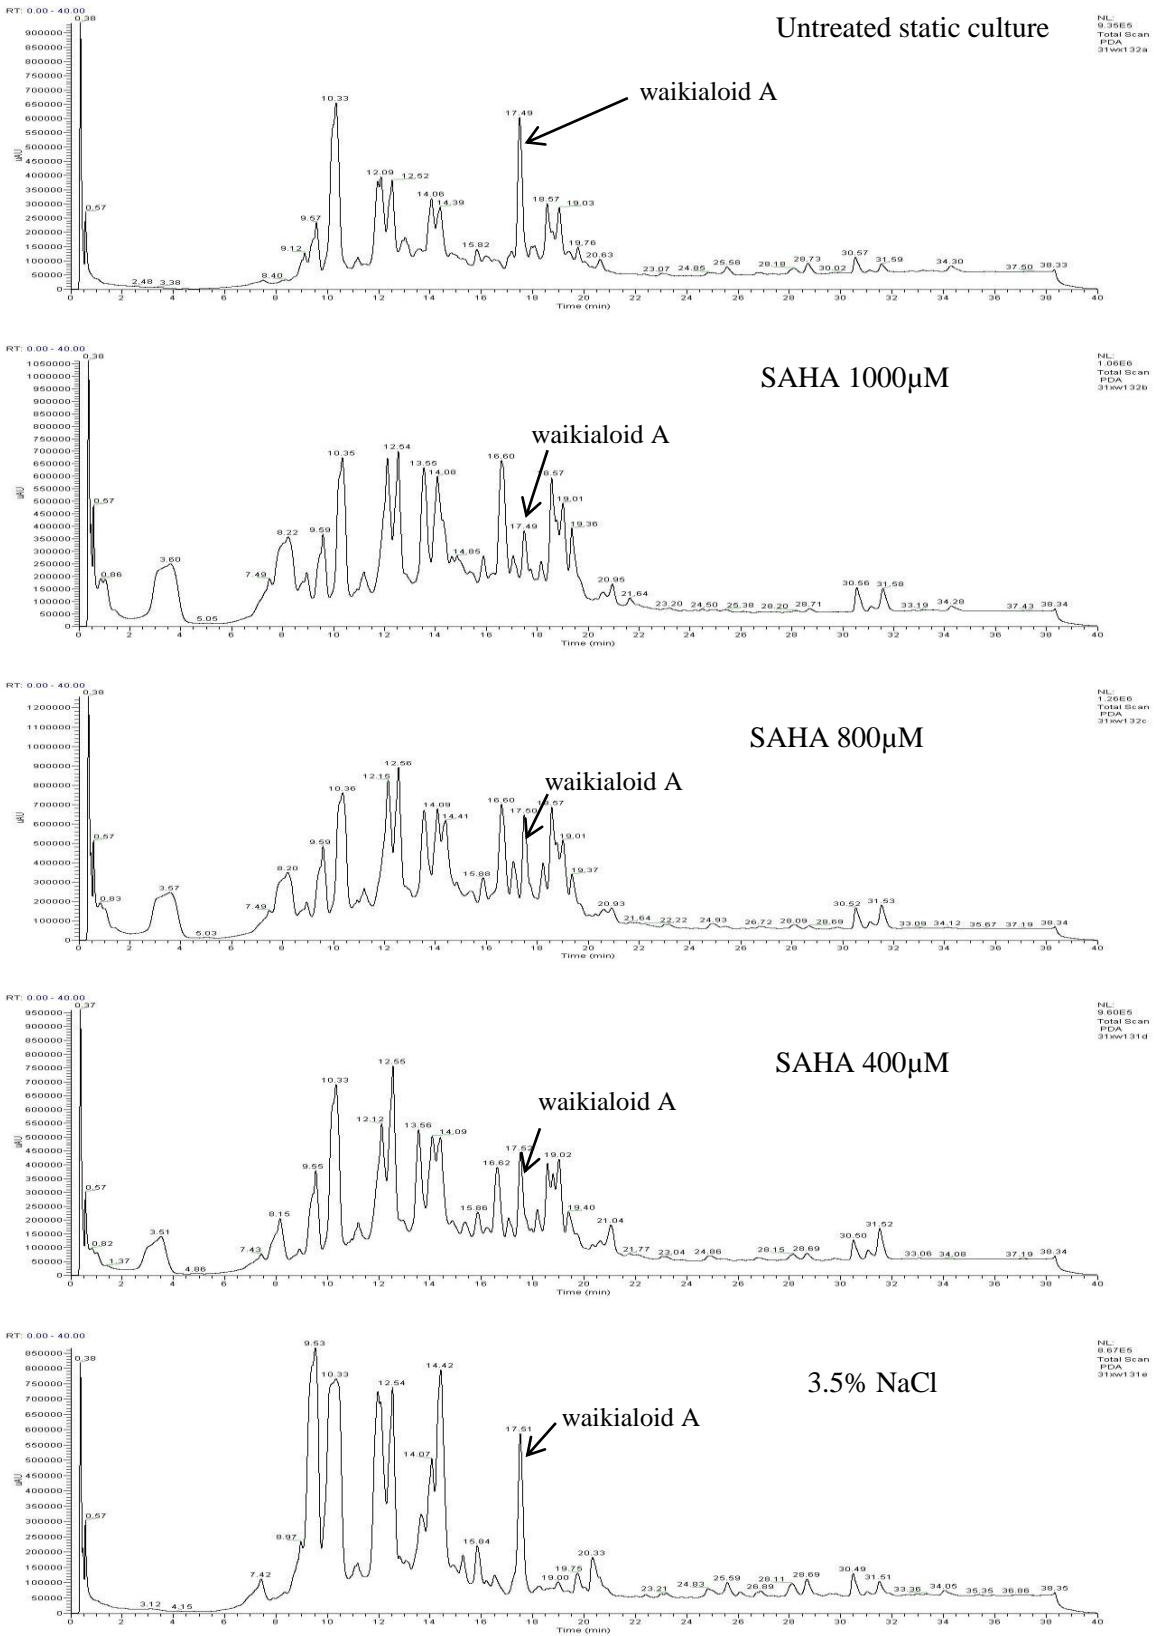

**Figure S1.** LC-MS profiles of extracts prepared for the Hawaiian *Aspergillus* sp. isolate.

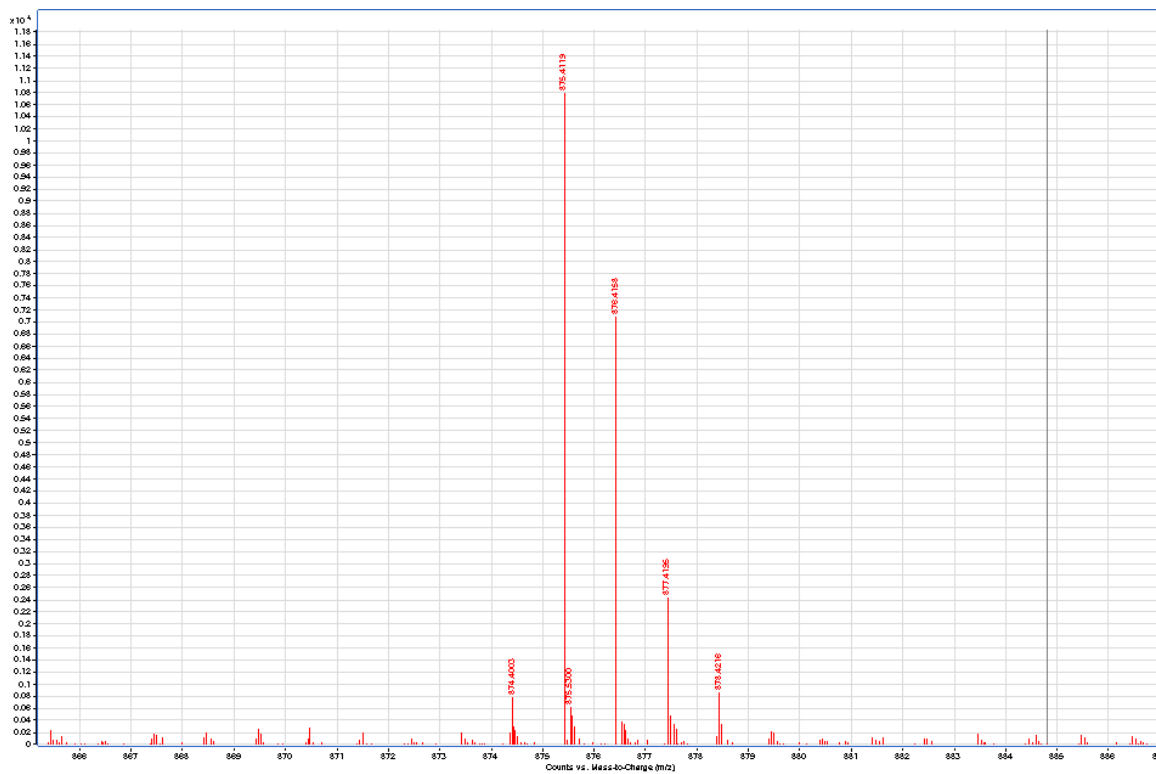

**Figure S2.** HRESIMS of waikialoid A (1).

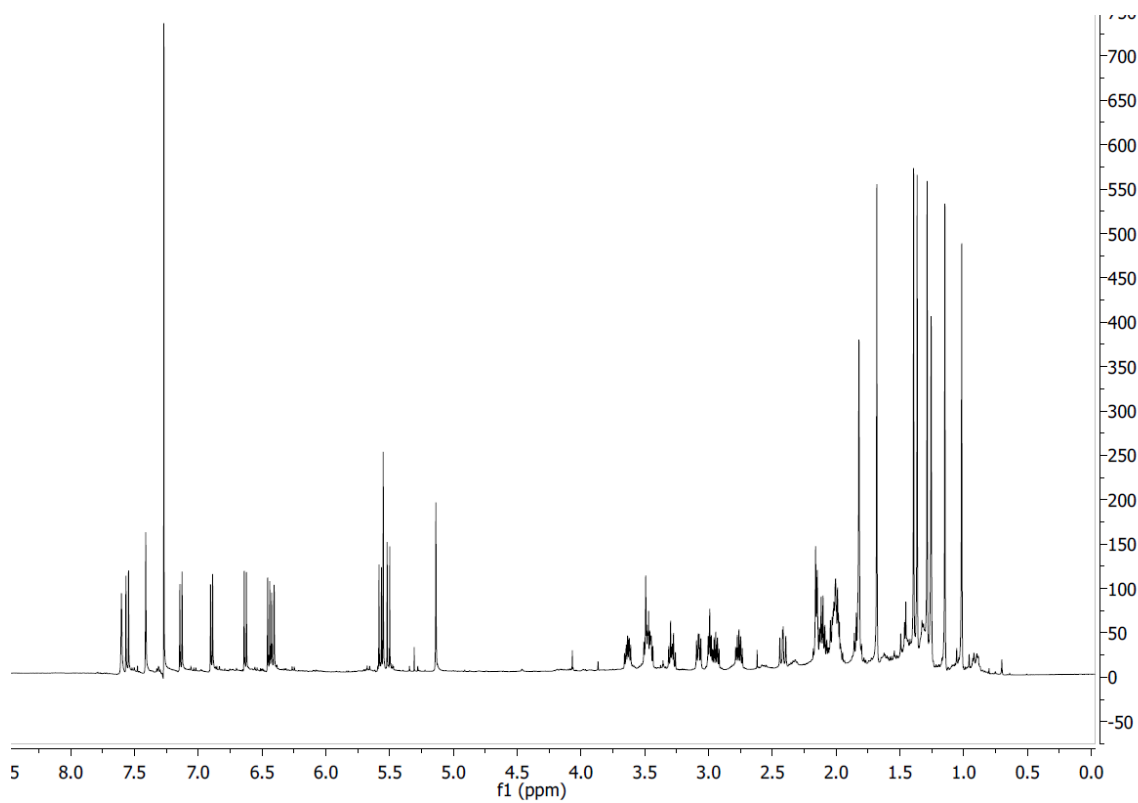

**Figure S3.** <sup>1</sup>H-NMR spectrum (500 MHz, CDCl<sub>3</sub>) of waikialoid A (**1**).

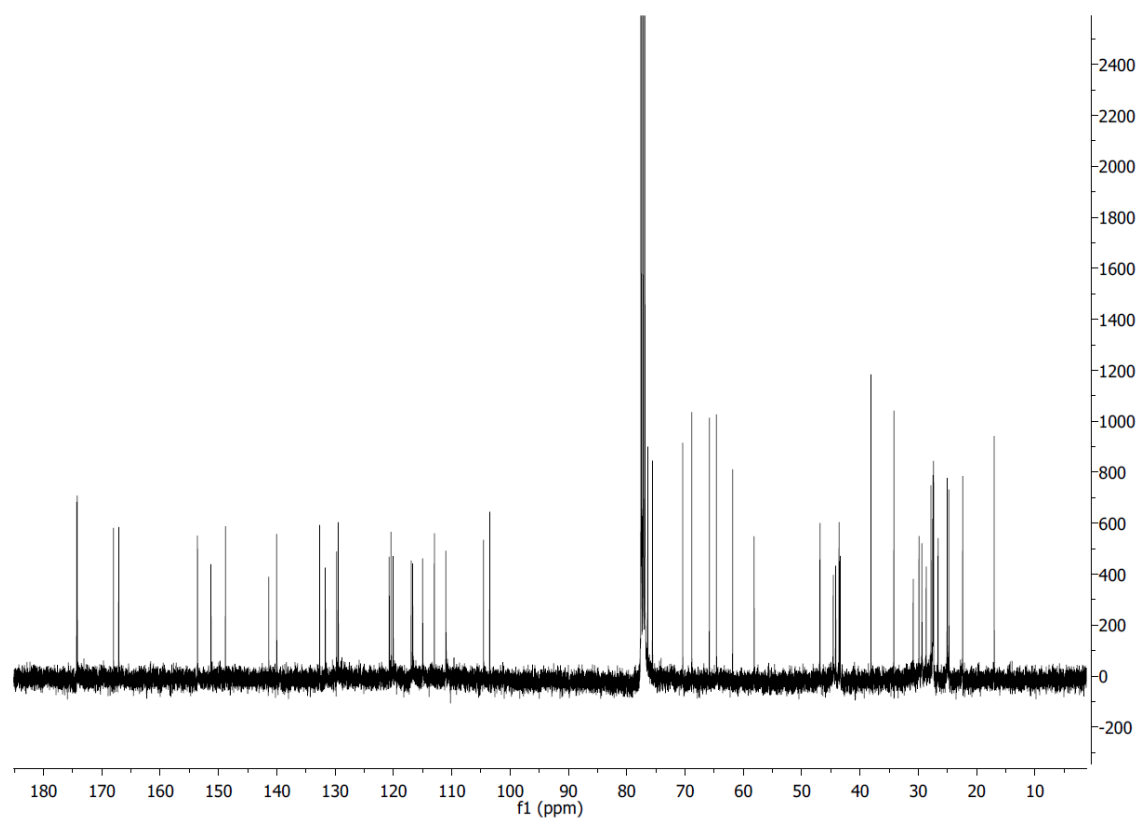

**Figure S4.**  $^{13}\text{C}$ -NMR spectrum (100 MHz,  $\text{CDCl}_3$ ) of waikialoid A (**1**).

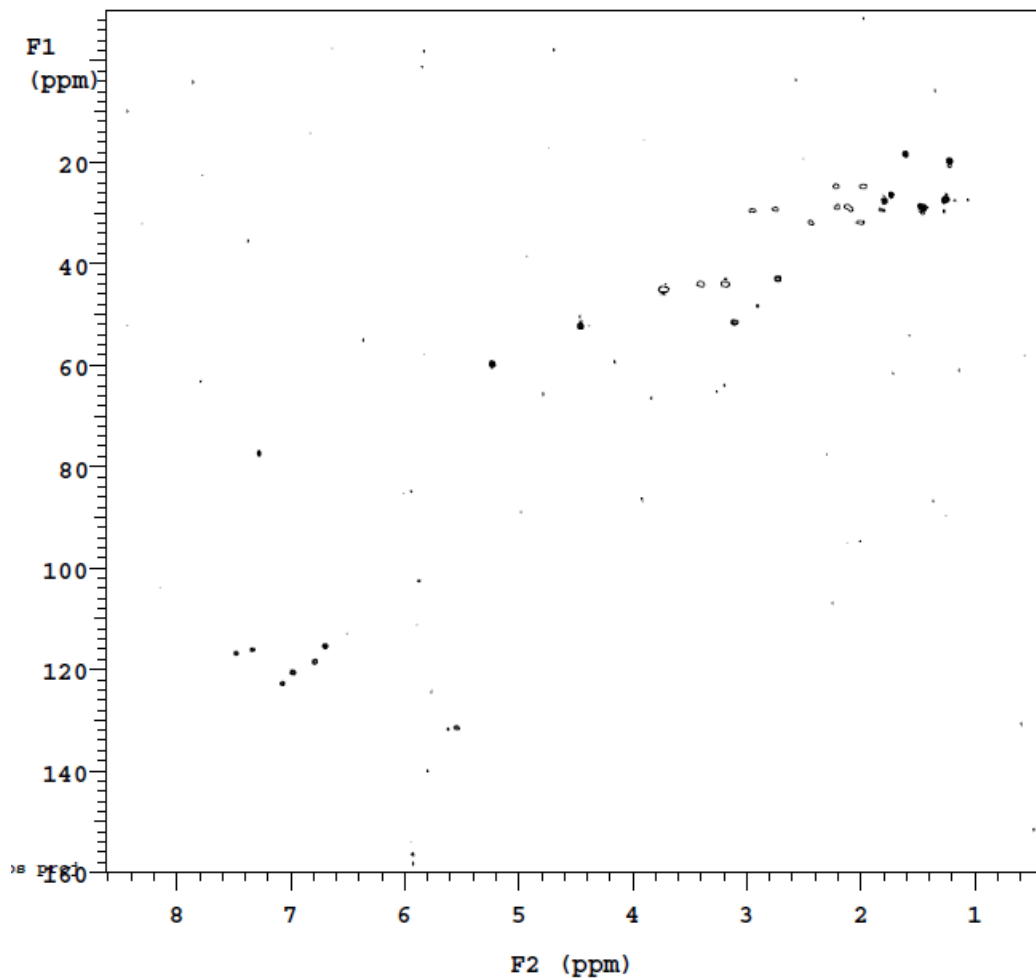

**Figure S5.** HSQC-NMR spectrum (500 MHz, CDCl<sub>3</sub>) of waikialoid A (**1**).

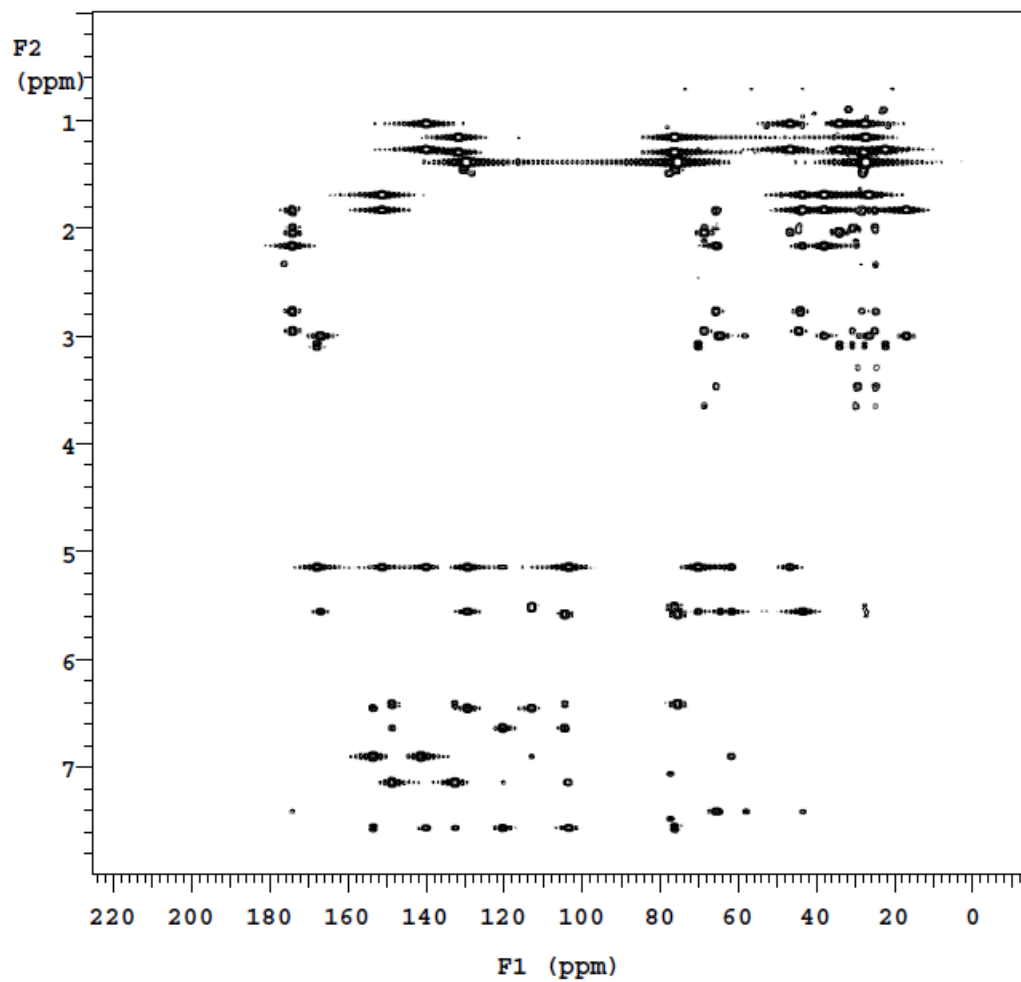

**Figure S6.** HMBC-NMR spectrum (500 MHz, CDCl<sub>3</sub>) of waikialoid A (**1**).

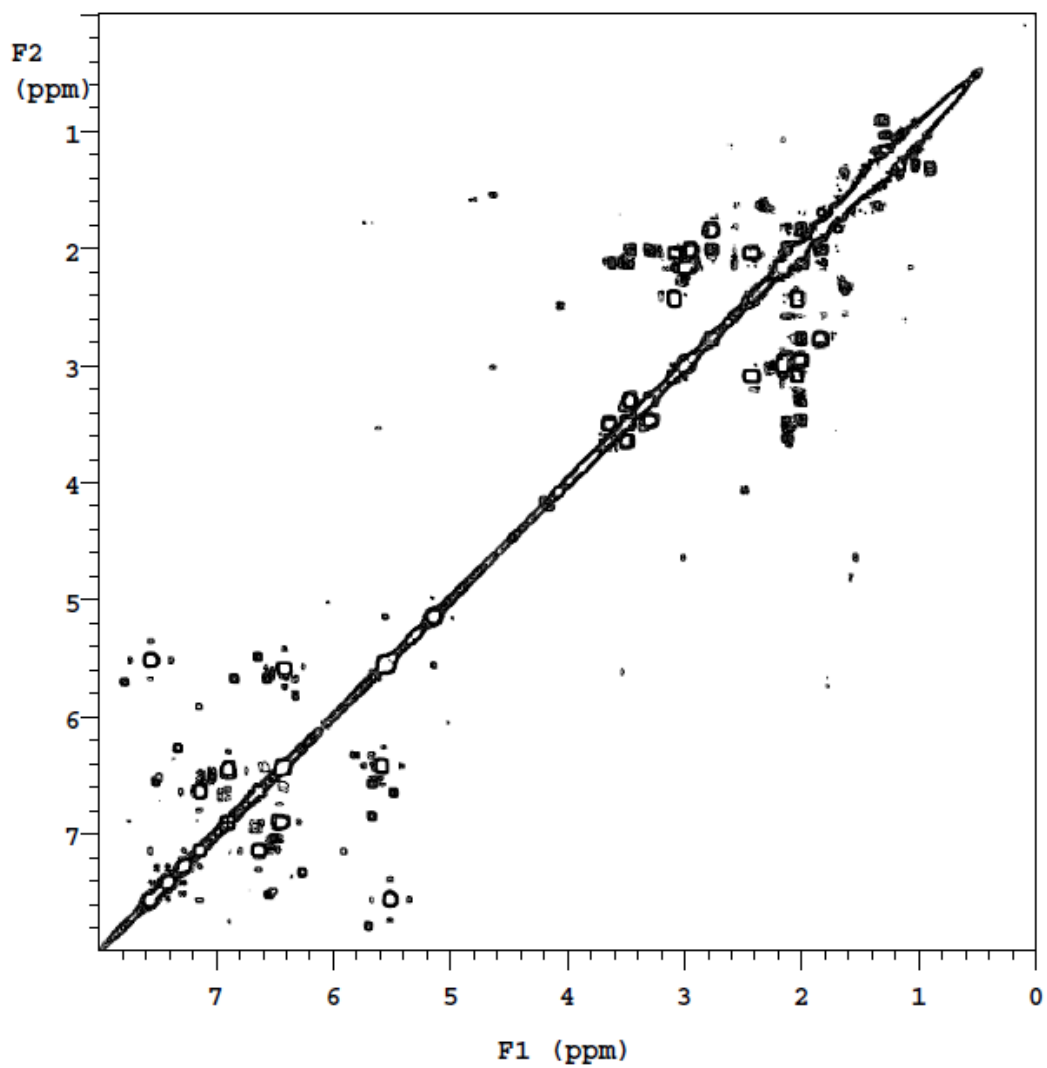

**Figure S7.** COSY-NMR spectrum (500 MHz, CDCl<sub>3</sub>) of waikialoid A (**1**).



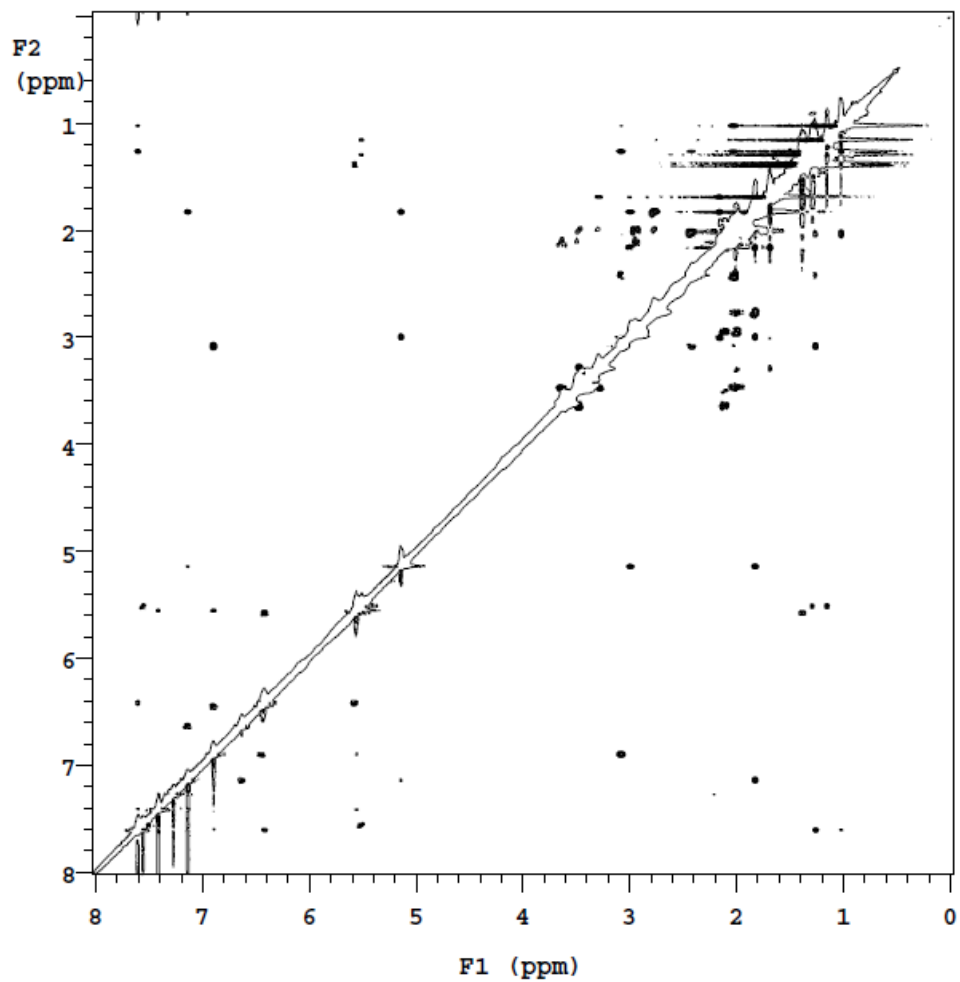

**Figure S8.** NOESY-NMR spectrum (500 MHz, CDCl<sub>3</sub>) of waikialoid A (**1**).

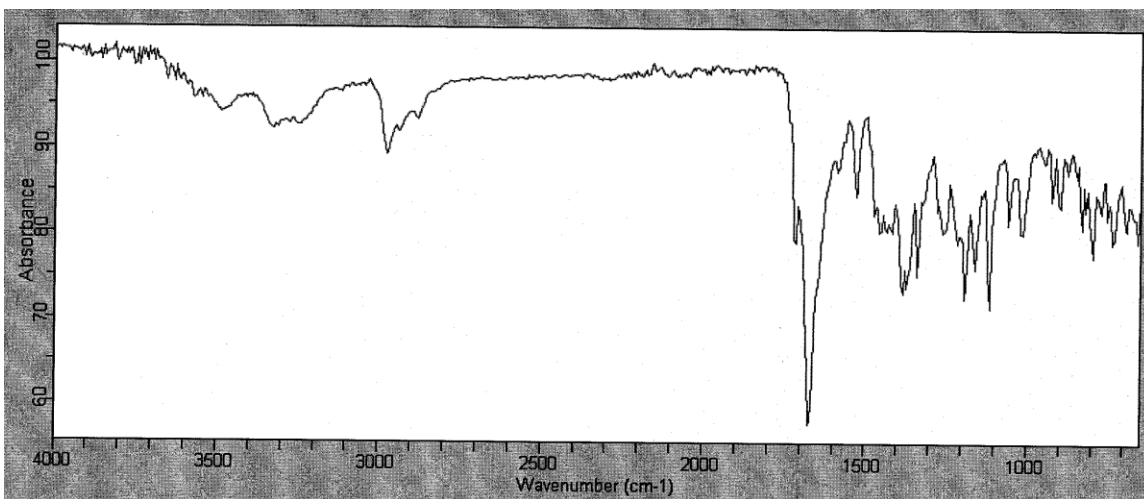

**Figure S9.** FTIR spectrum of waikialoid A (**1**).

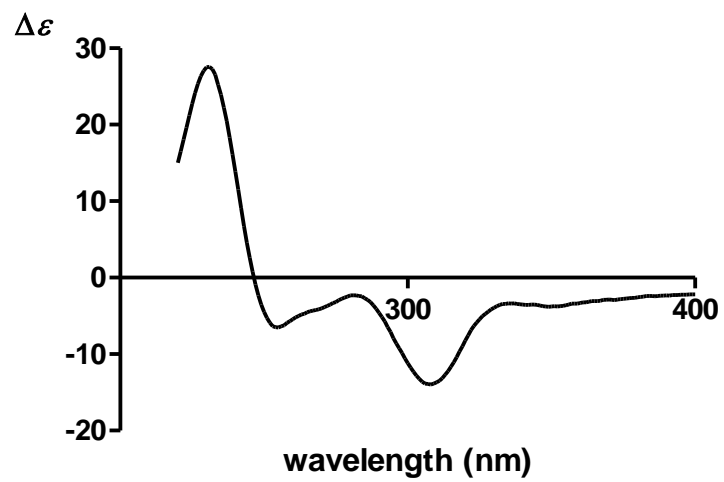

**Figure S10.** CD spectrum of waikialoid A (1).

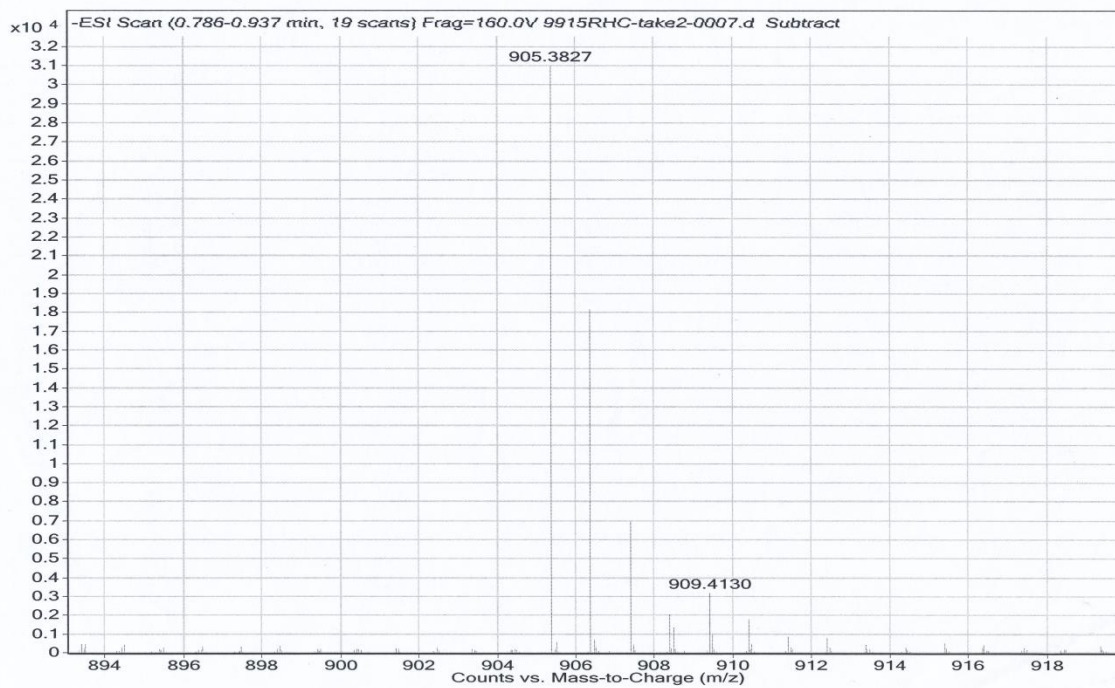

**Figure S11.** HRESIMS of waikialoid B (**14**).

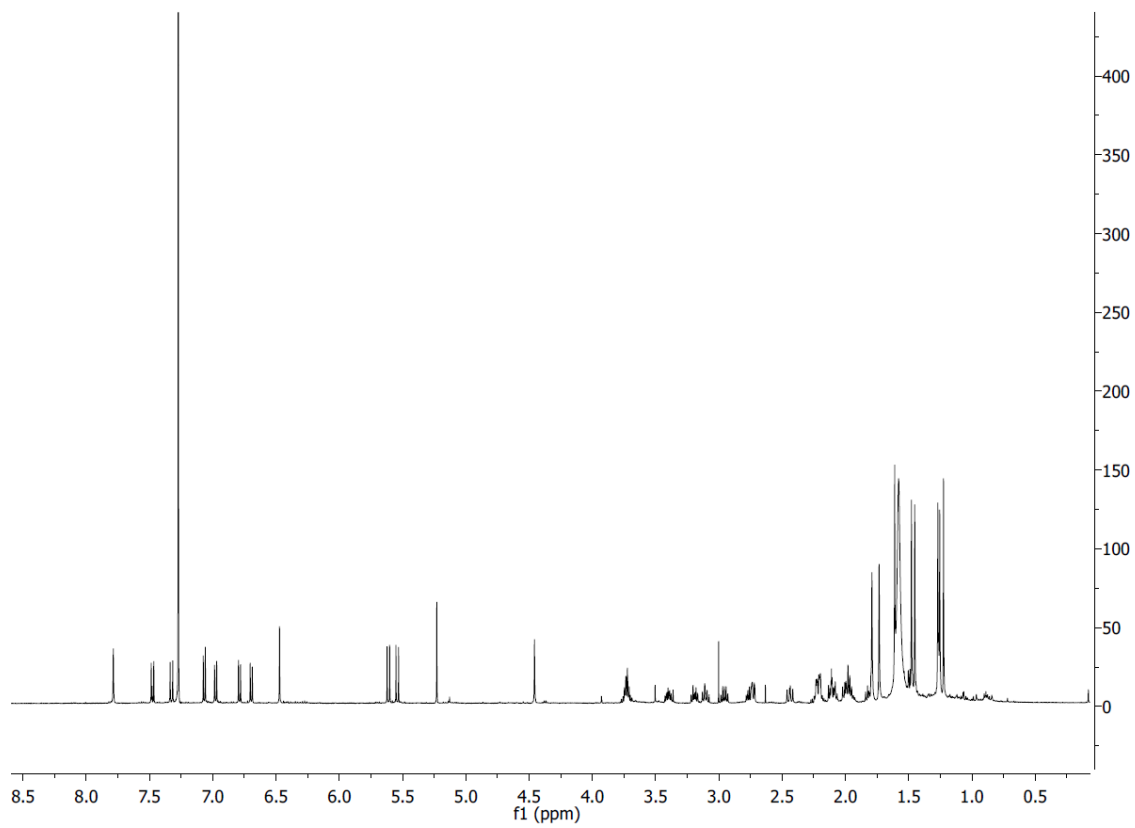

**Figure S12.** <sup>1</sup>H-NMR spectrum (500 MHz, CDCl<sub>3</sub>) of waikialoid B (**14**).

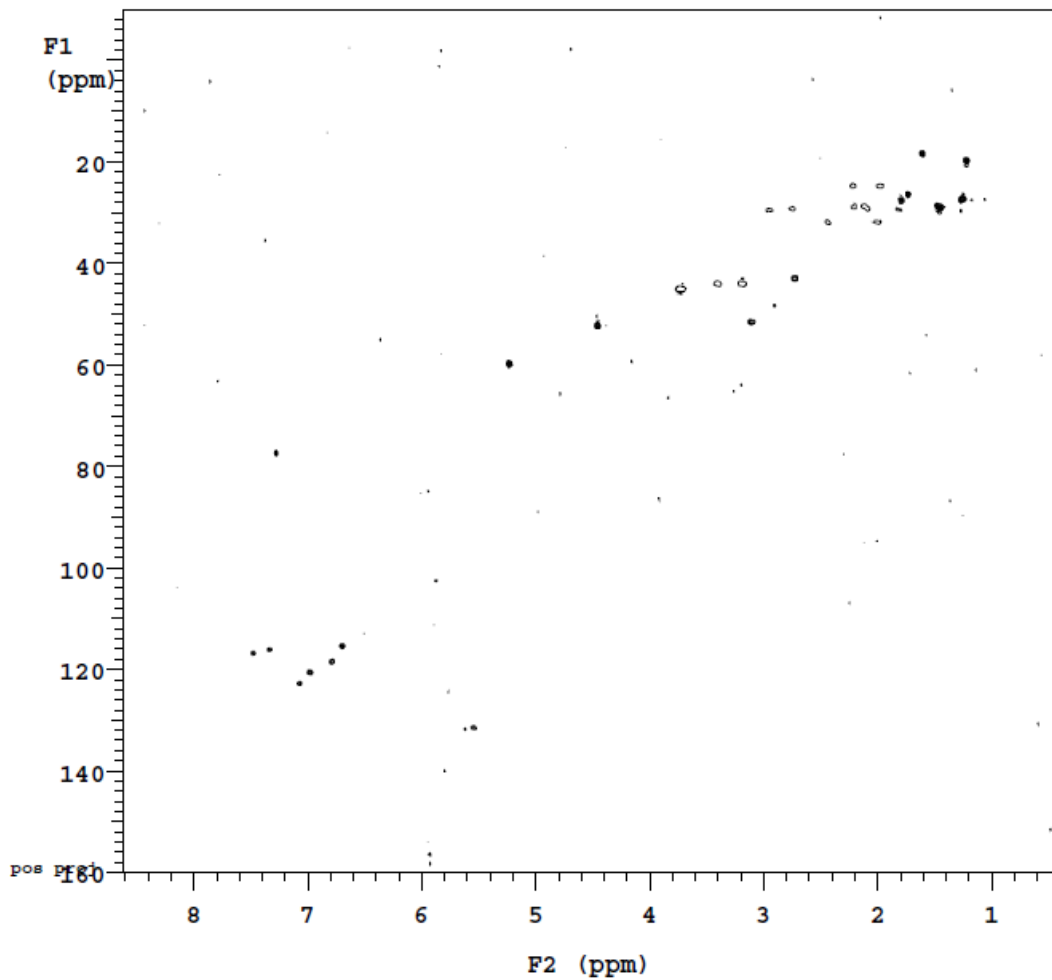

**Figure S13.** HSQC-NMR spectrum (500 MHz, CDCl<sub>3</sub>) of waikialoid B (14).

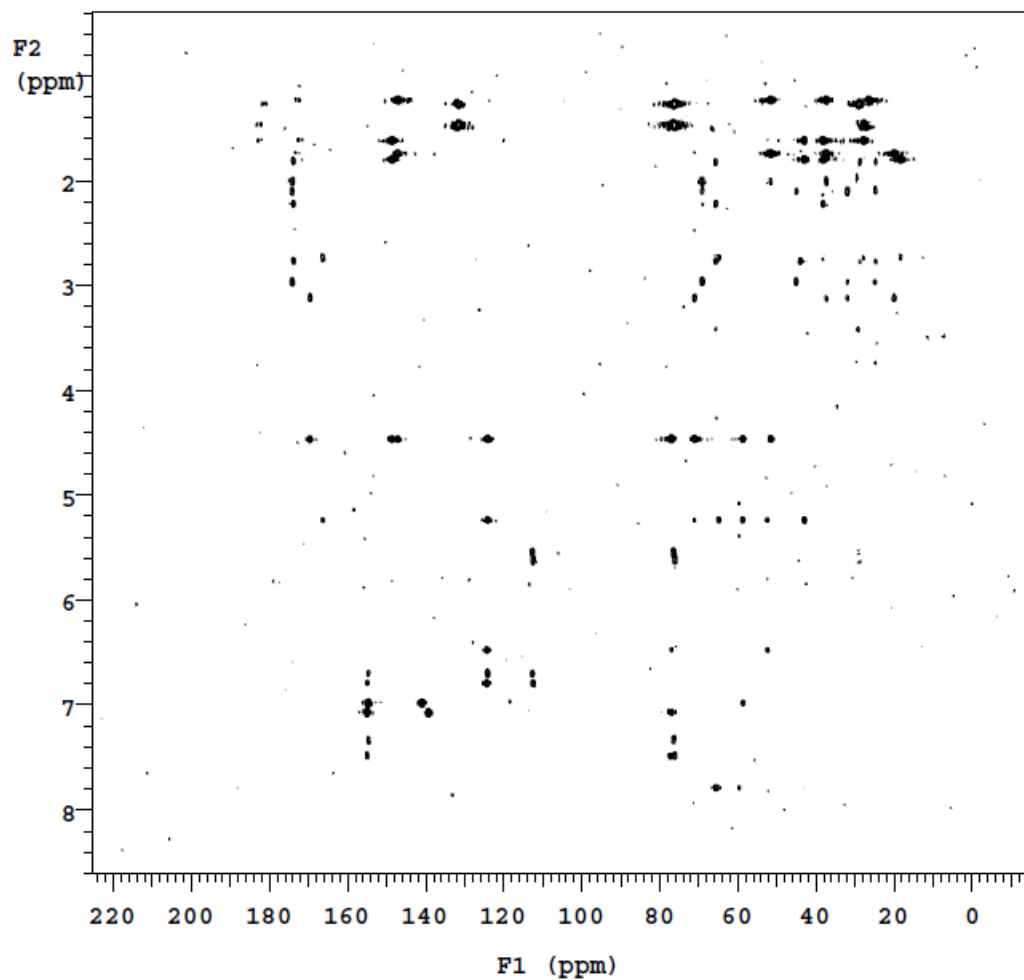

**Figure S14.** HMBC-NMR spectrum (500 MHz, CDCl<sub>3</sub>) of waikialoid B (**14**).

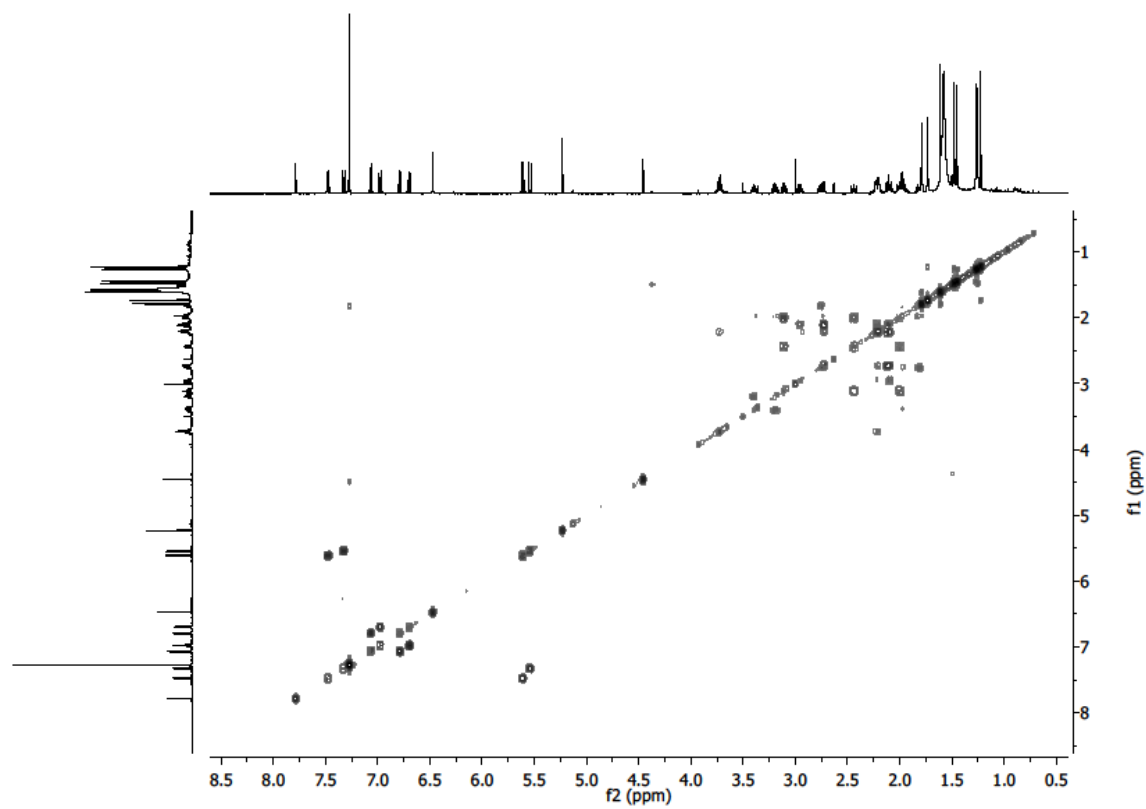

**Figure S15.** COSY-NMR spectrum (500 MHz, CDCl<sub>3</sub>) of waikialoid B (**14**).



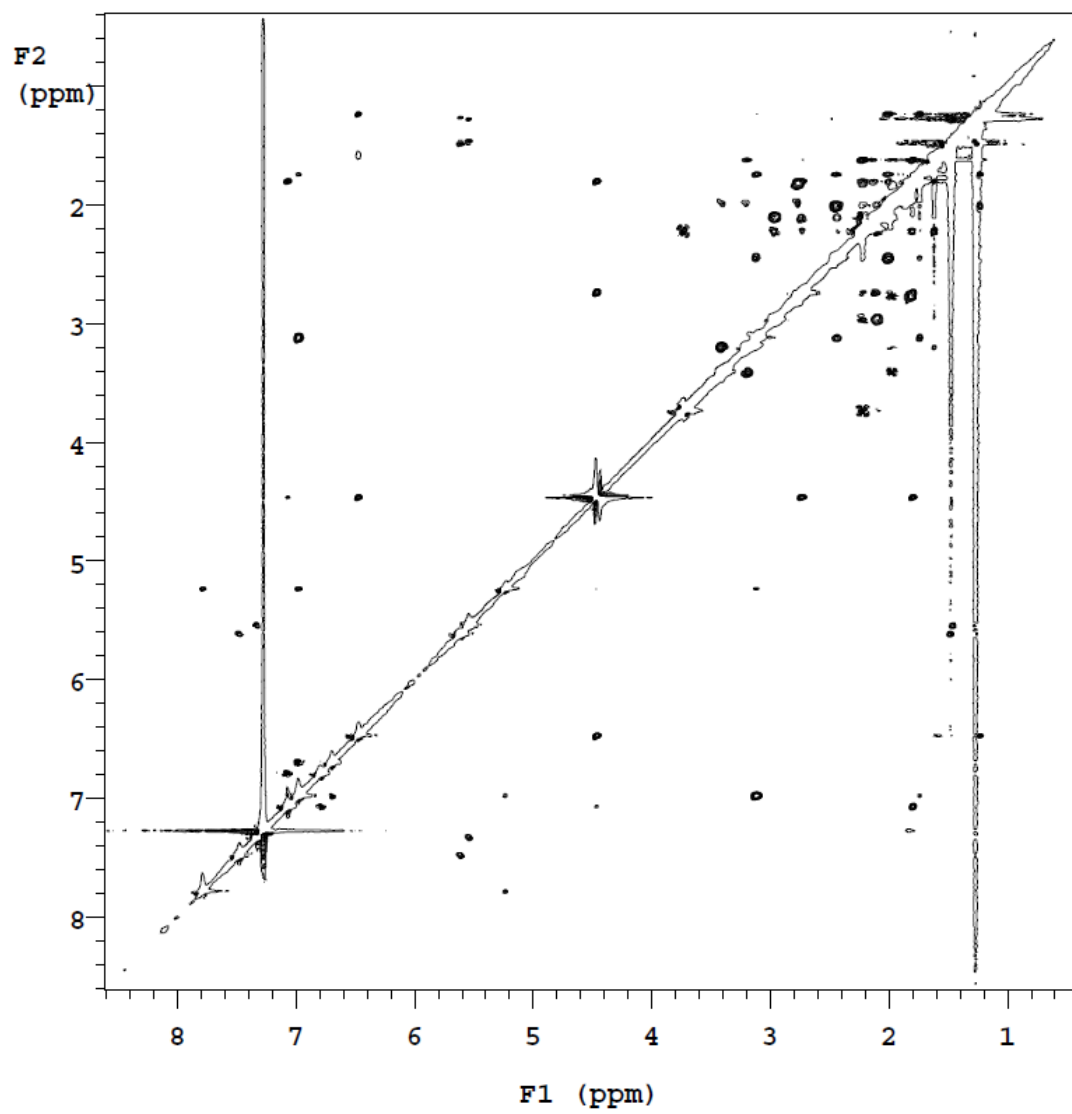

**Figure S16.** ROESY-NMR spectrum (500 MHz, CDCl<sub>3</sub>) of waikialoid B (**14**).

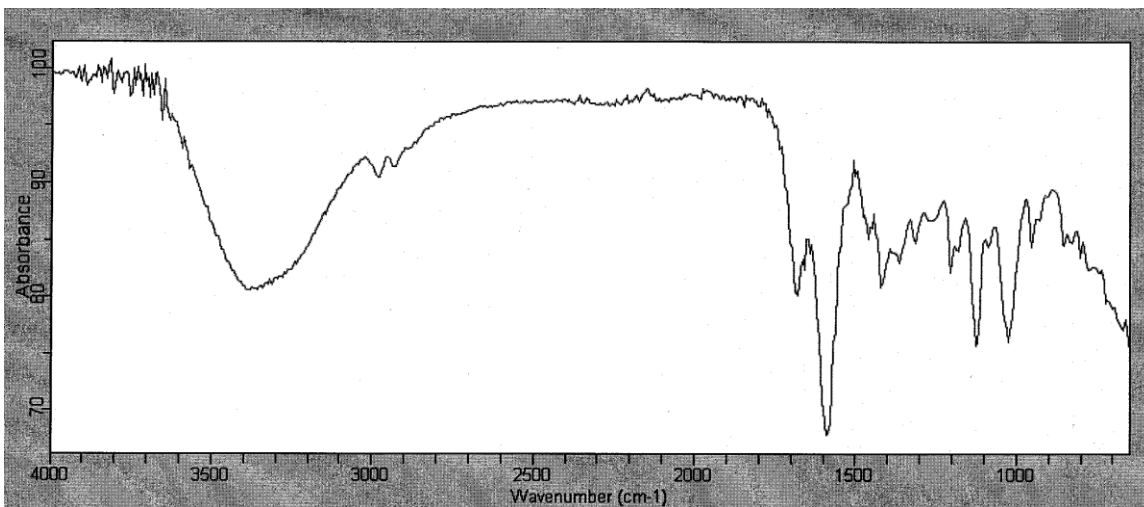

**Figure S17.** FTIR spectrum of waikialoid B (14).

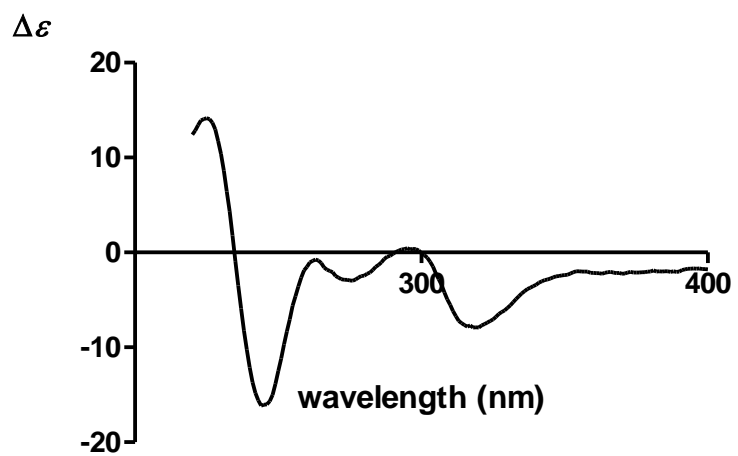

**Figure S18.** CD spectrum of waikialoid B (**14**).

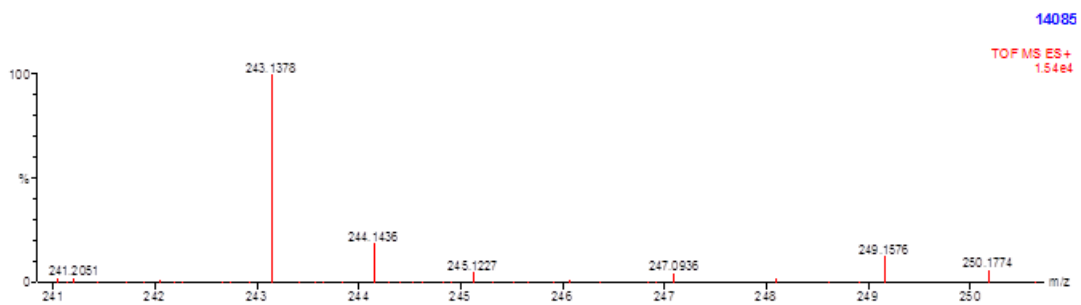

**Figure S19.** HRESIMS of waikialide A (15).

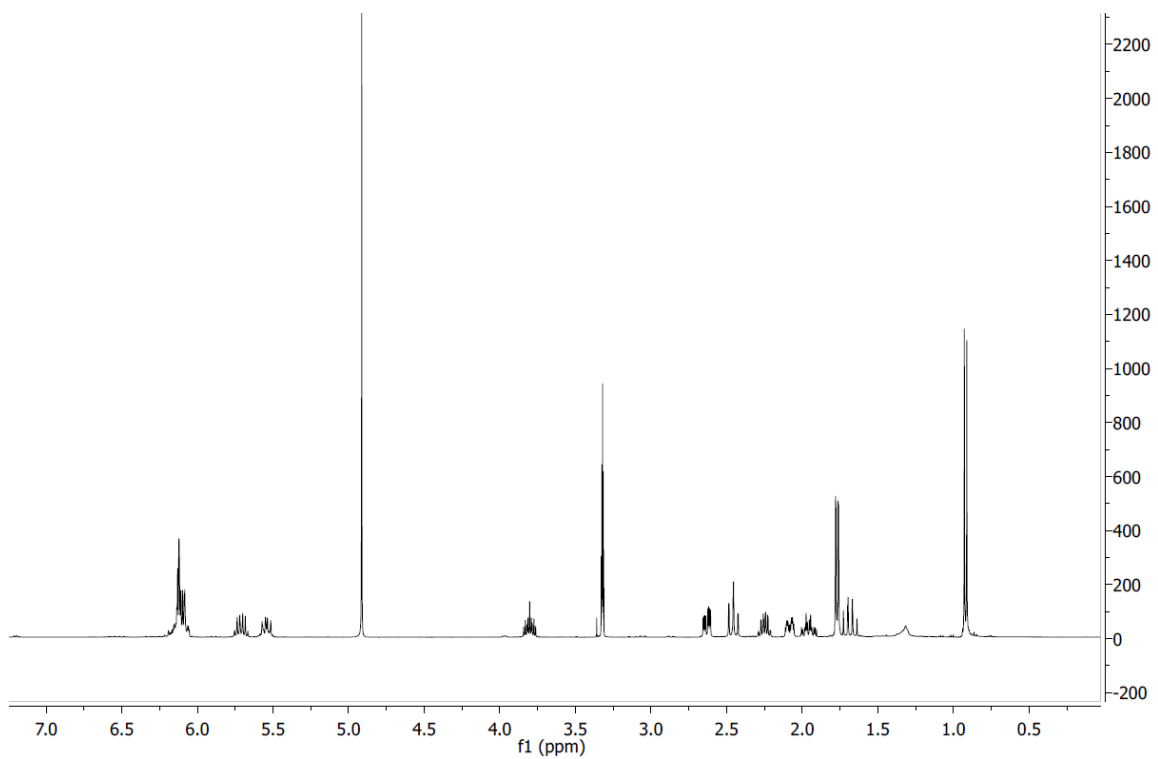

**Figure S20.** <sup>1</sup>H-NMR spectrum (400 MHz, CD<sub>3</sub>OD) waikialide A (**15**).

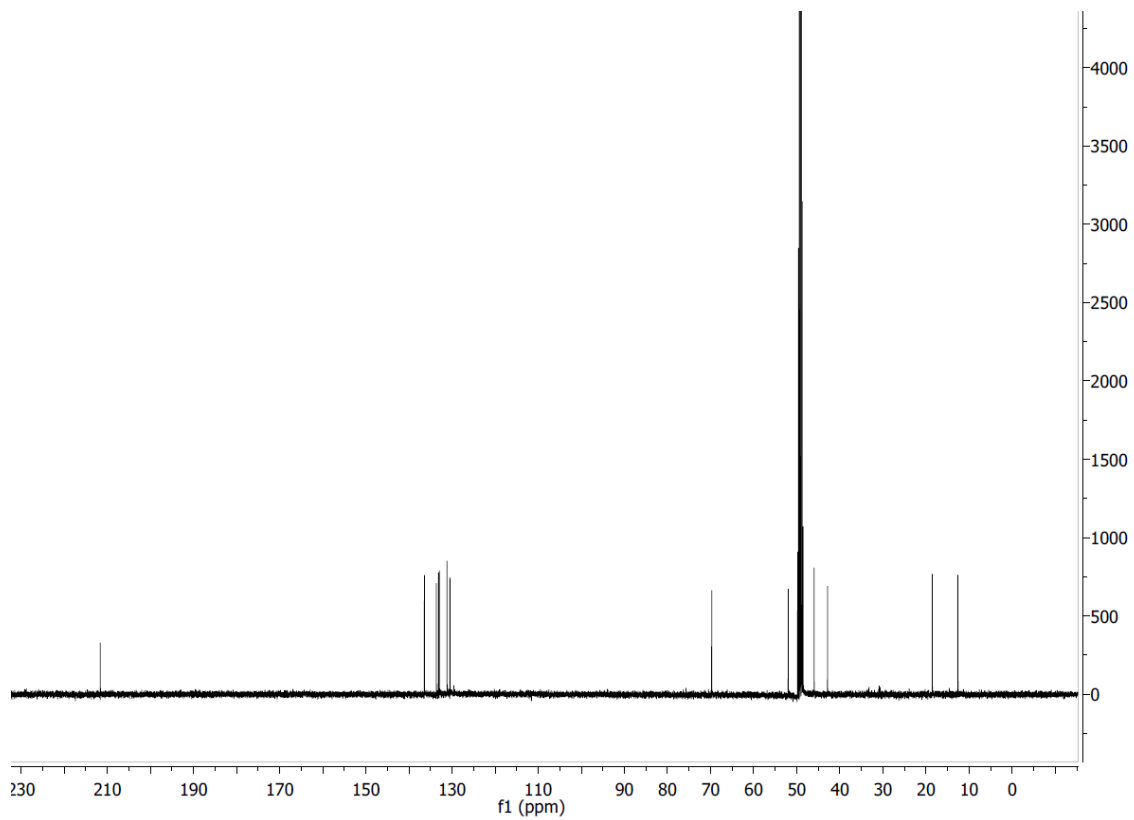

**Figure S21.**  $^{13}\text{C}$ -NMR spectrum (100 MHz,  $\text{CD}_3\text{OD}$ ) waikialide A (**15**).

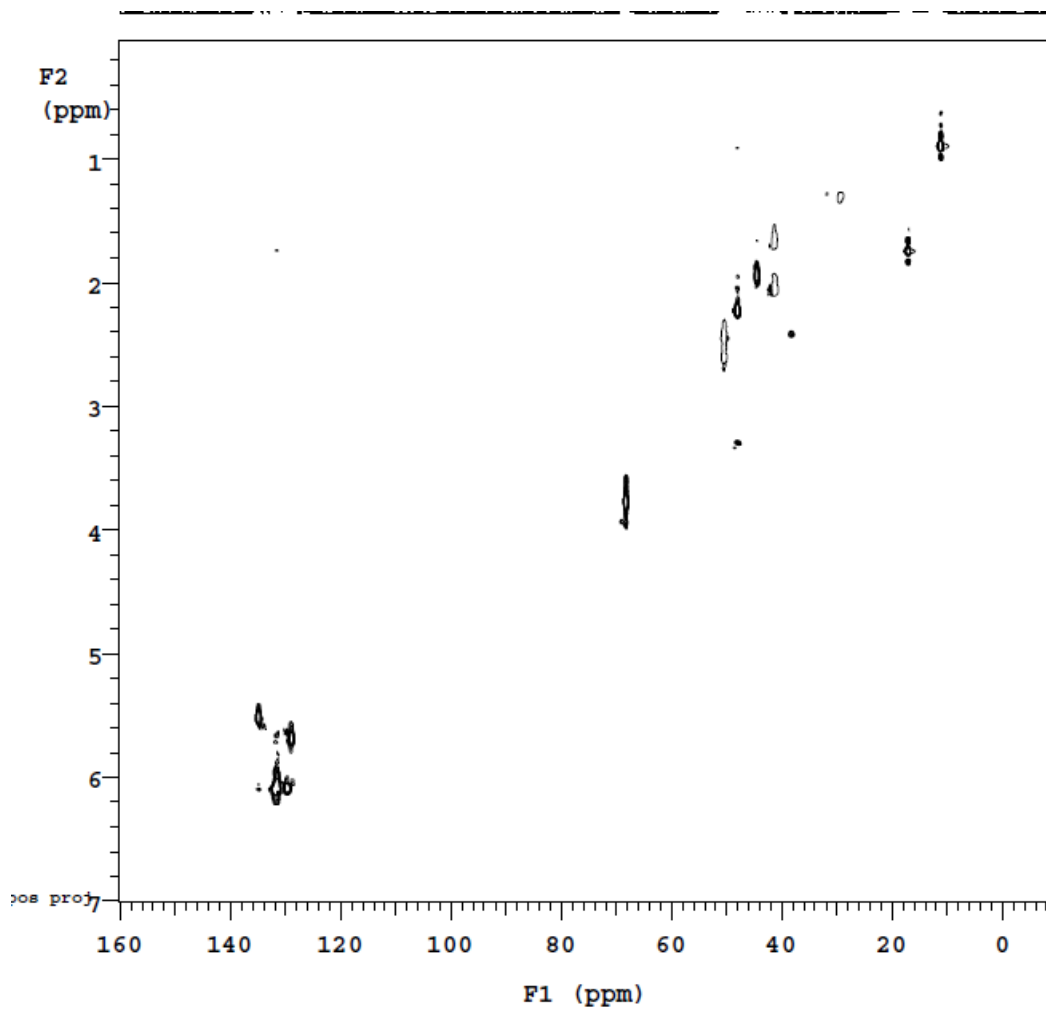

**Figure S22.** HSQC-NMR spectrum (400 MHz, CD<sub>3</sub>OD) waikialide A (**15**).

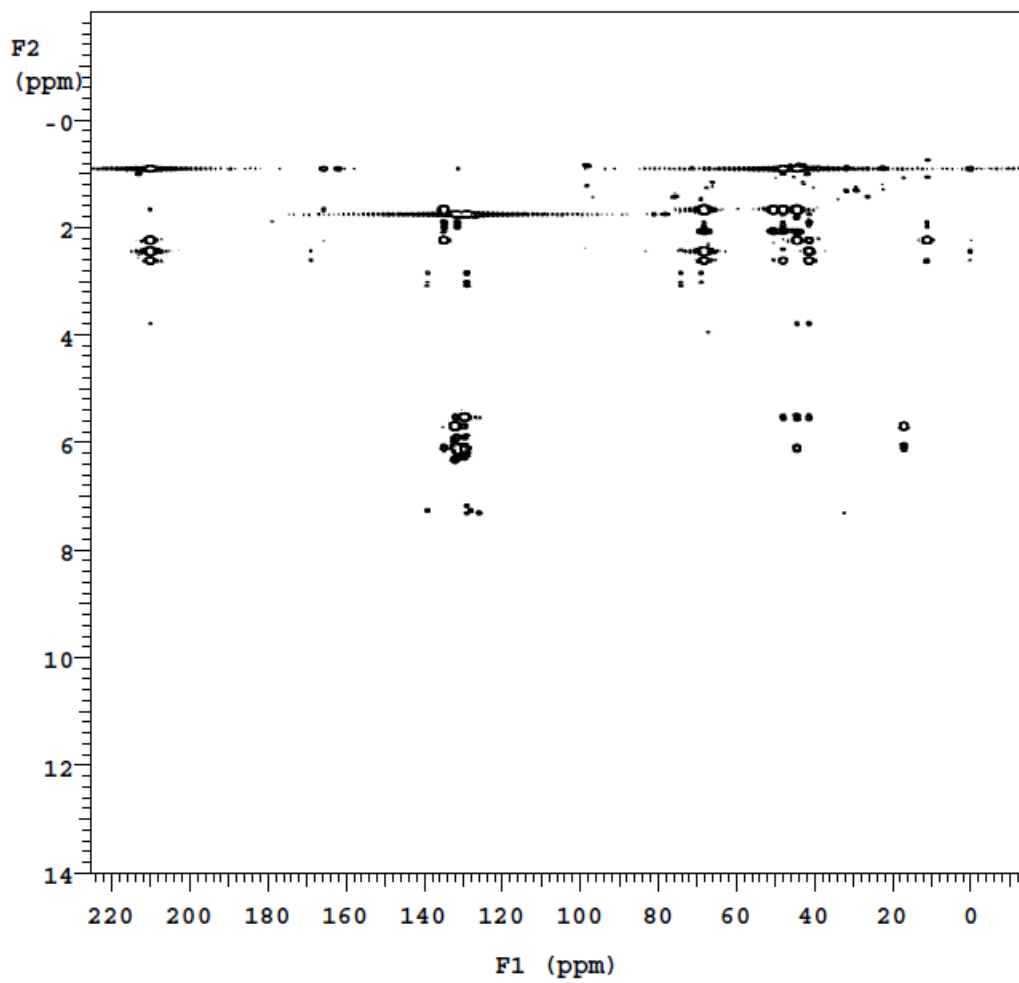

**Figure S23.** HMBC-NMR spectrum (500 MHz, CD<sub>3</sub>OD) waikialide A (**15**).





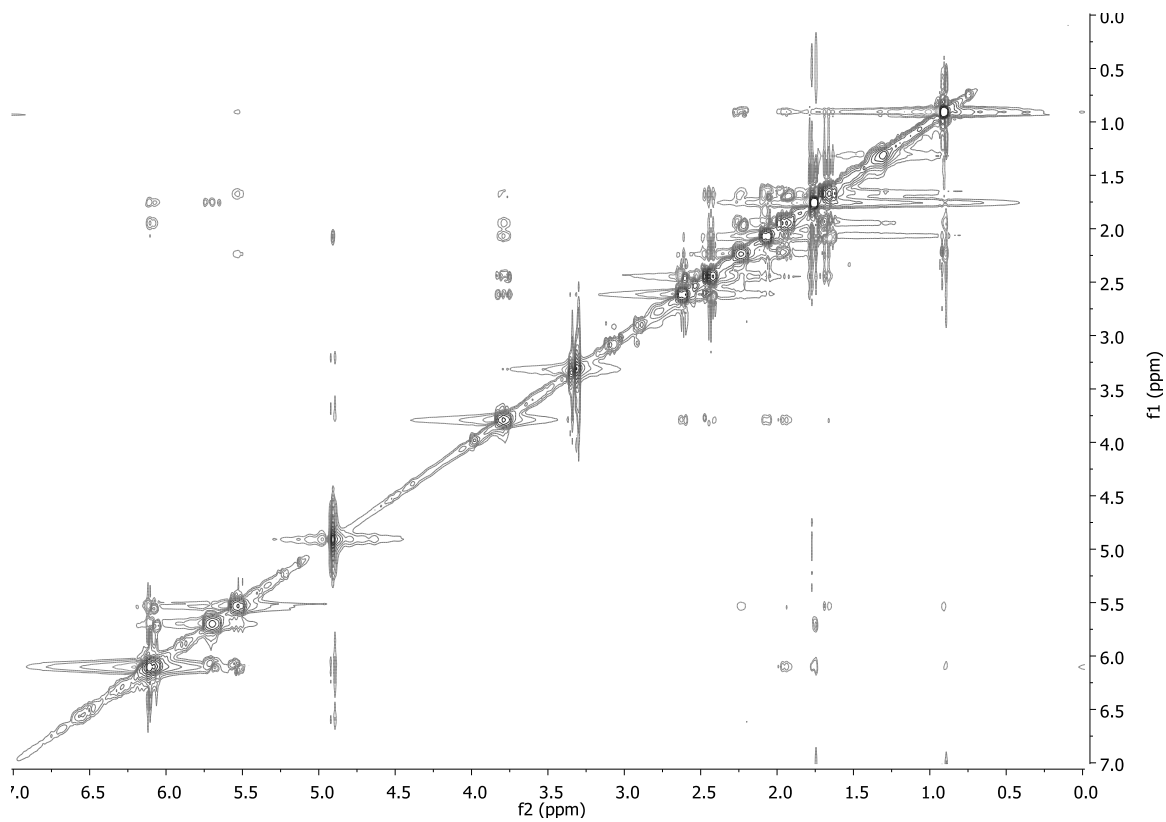

**Figure S25.** NOESY-NMR spectrum (400 MHz, CD<sub>3</sub>OD) of waikialide A (**15**).

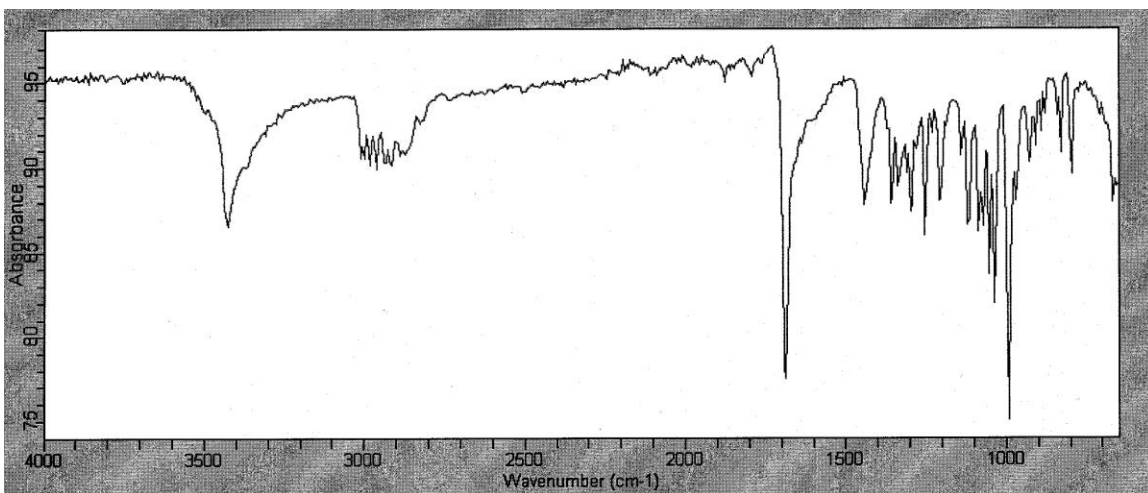

**Figure S26.** FTIR spectrum of waikialide A (**15**).

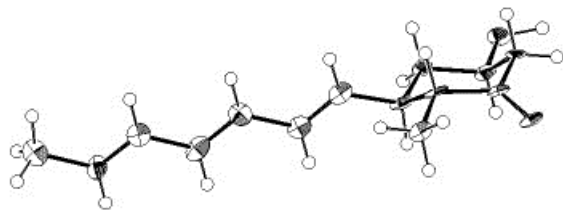

**Figure S27.** ORTEP structure for **15** generated from the X-ray diffraction data.

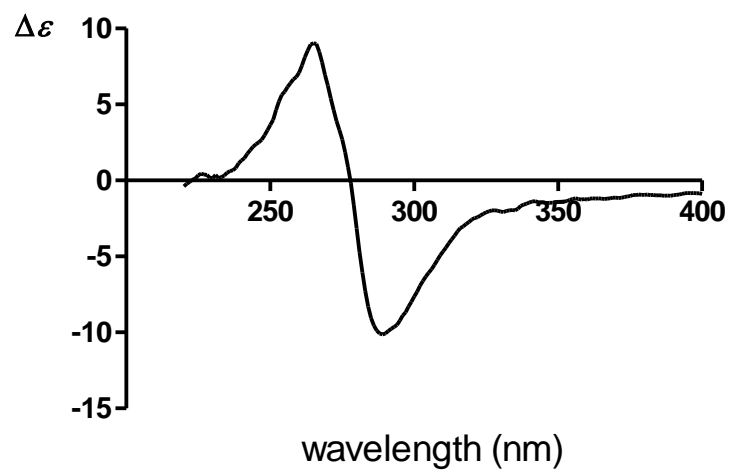

**Figure S28.** CD spectrum of waikialide A (**15**).

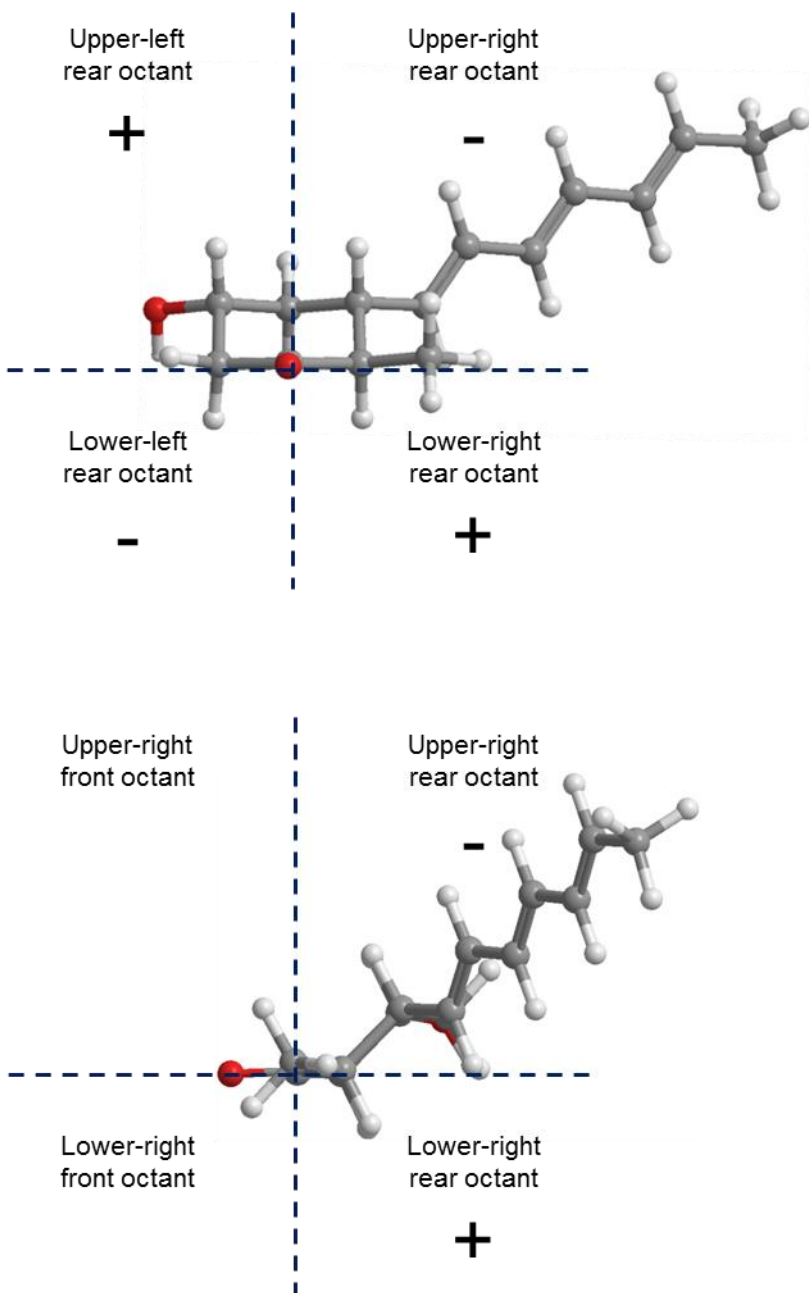

**Figure S29.** Octant rule applied to waikialide A (15).

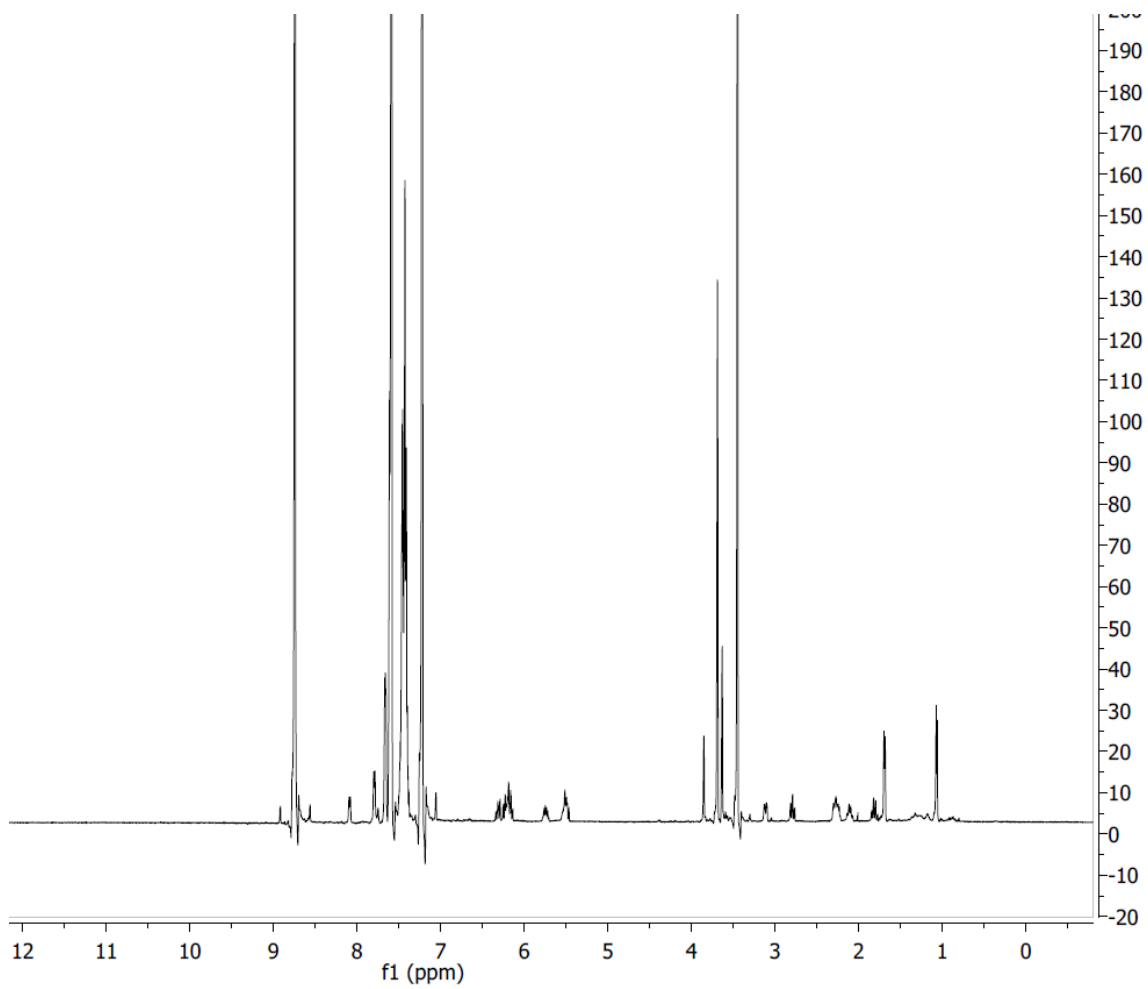

**Figure S30.**  $^1\text{H}$ -NMR (500 MHz, pyridine- $d_5$ ) of derivative of waikialide A (**15a**).

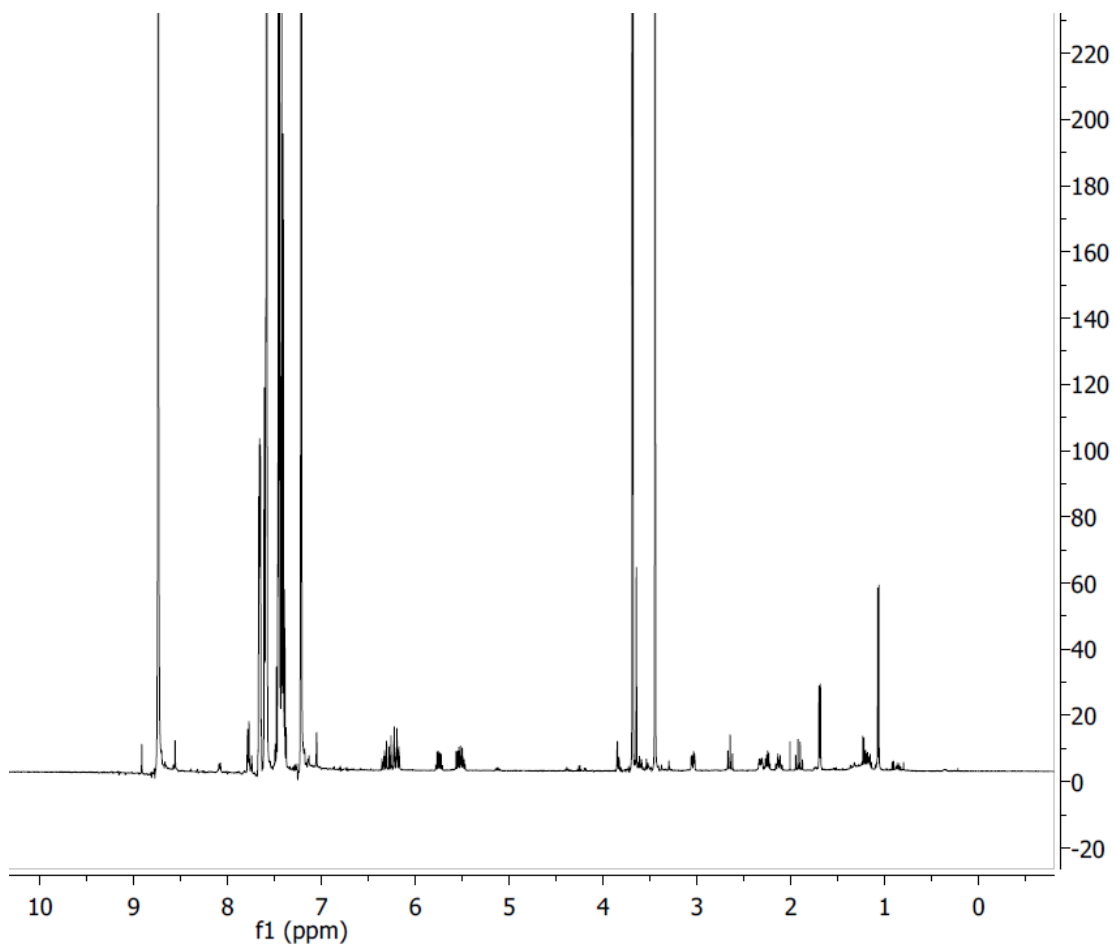

**Figure S31.**  $^1\text{H}$ -NMR (500 MHz, pyridine- $d_5$ ) of derivative of waikialide A (**15b**).



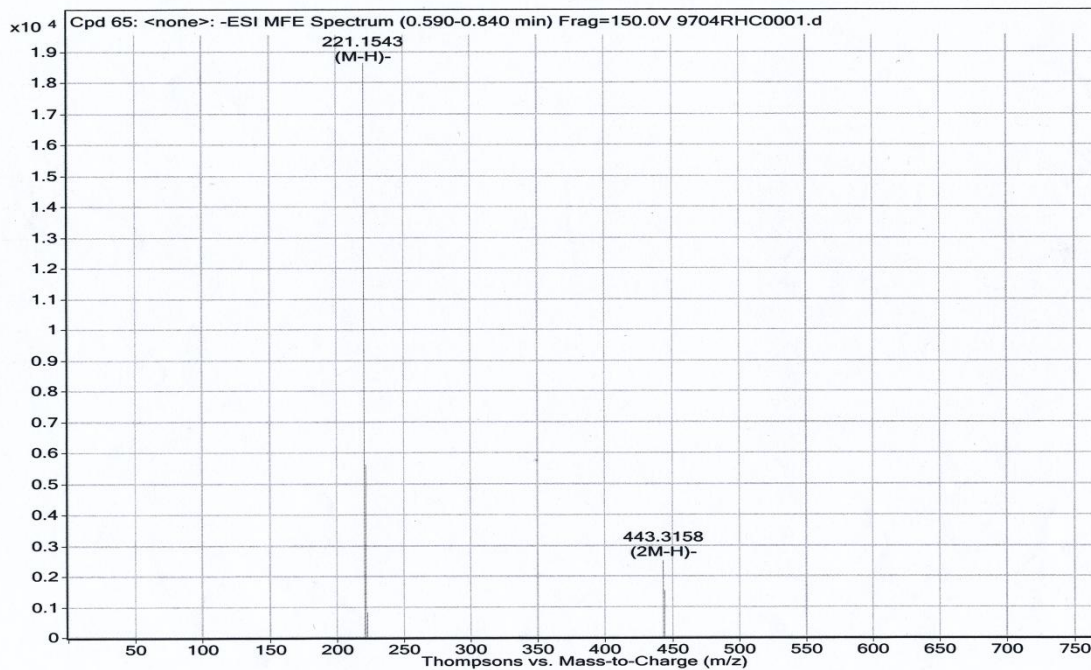

**Figure S32.** HRESIMS of waikialide B (**16**).

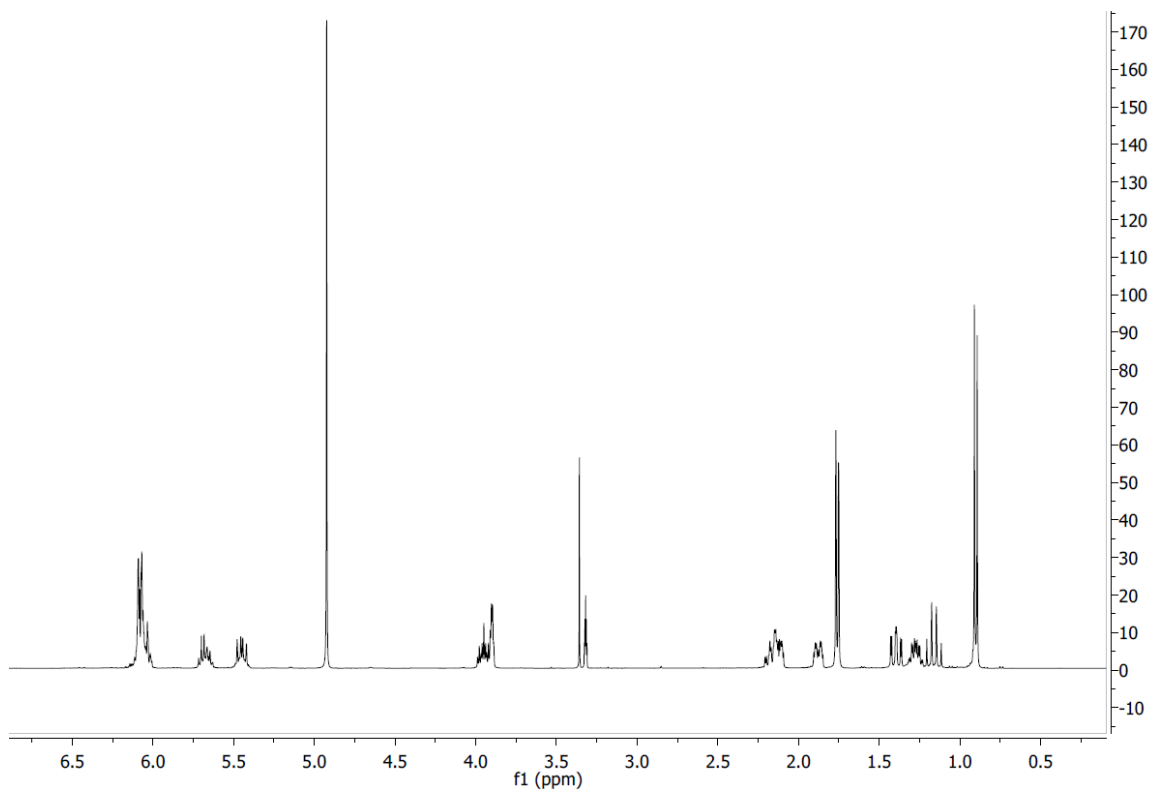

**Figure S33.**  $^1\text{H-NMR}$  spectrum (400 MHz,  $\text{CD}_3\text{OD}$ ) waikialide B (**16**).

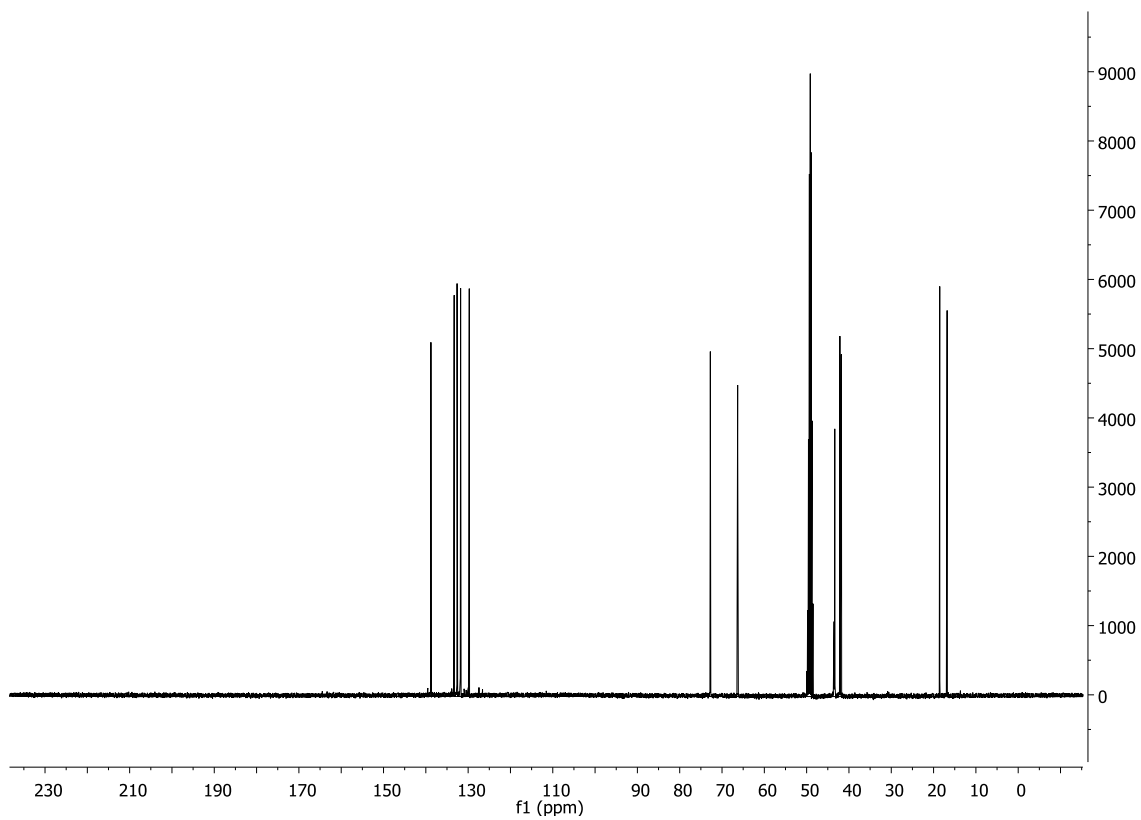

**Figure S34.** <sup>13</sup>C-NMR spectrum (100 MHz, CD<sub>3</sub>OD) waikialide B (**16**).

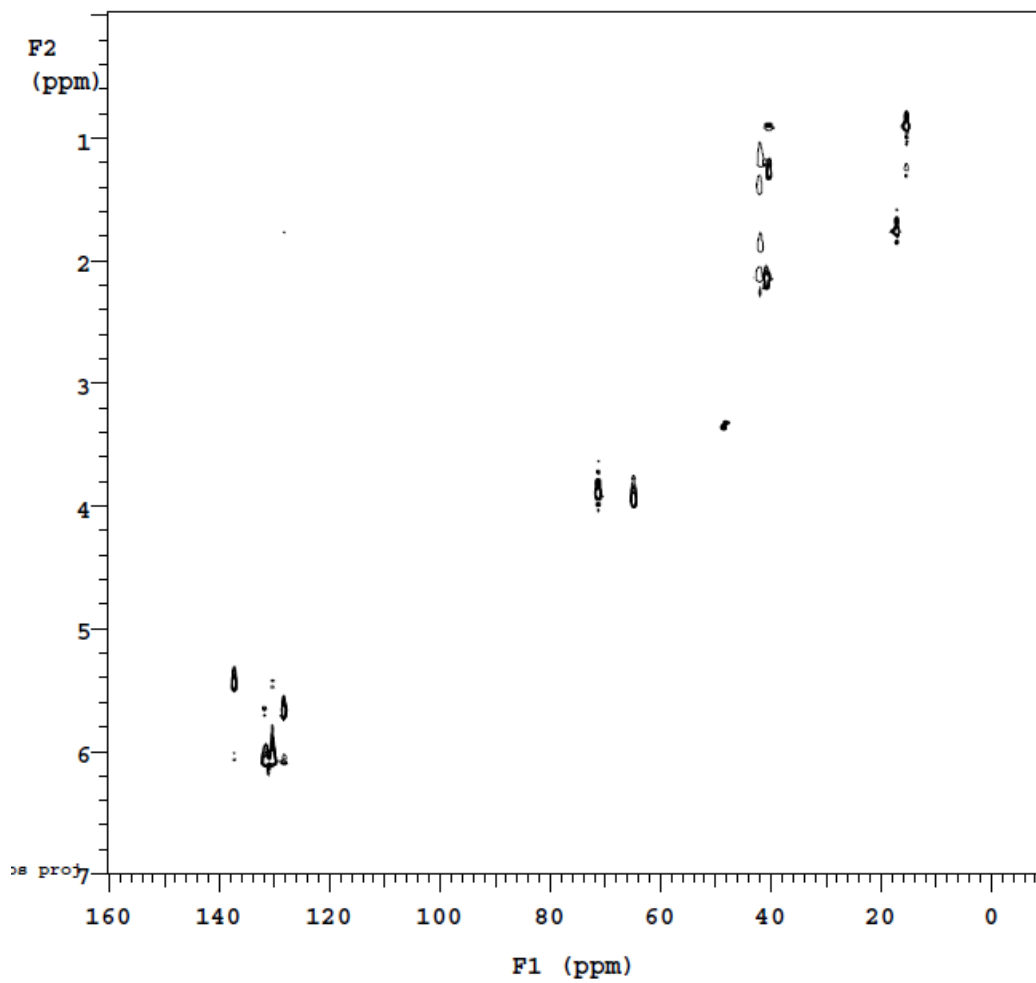

**Figure S35.** HSQC-NMR spectrum (400 MHz, CD<sub>3</sub>OD) waikialide B (**16**).

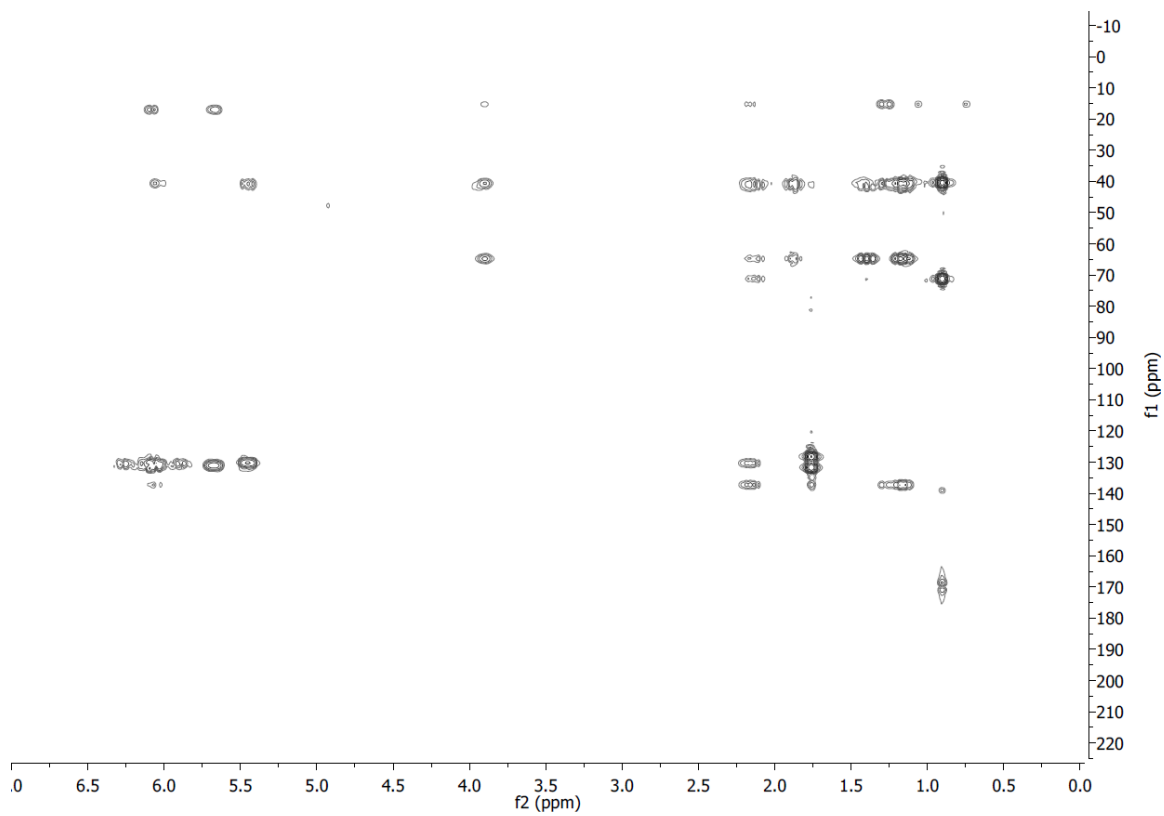

**Figure S36.** HMBC-NMR spectrum (400 MHz, CD<sub>3</sub>OD) waikialide B (**16**).

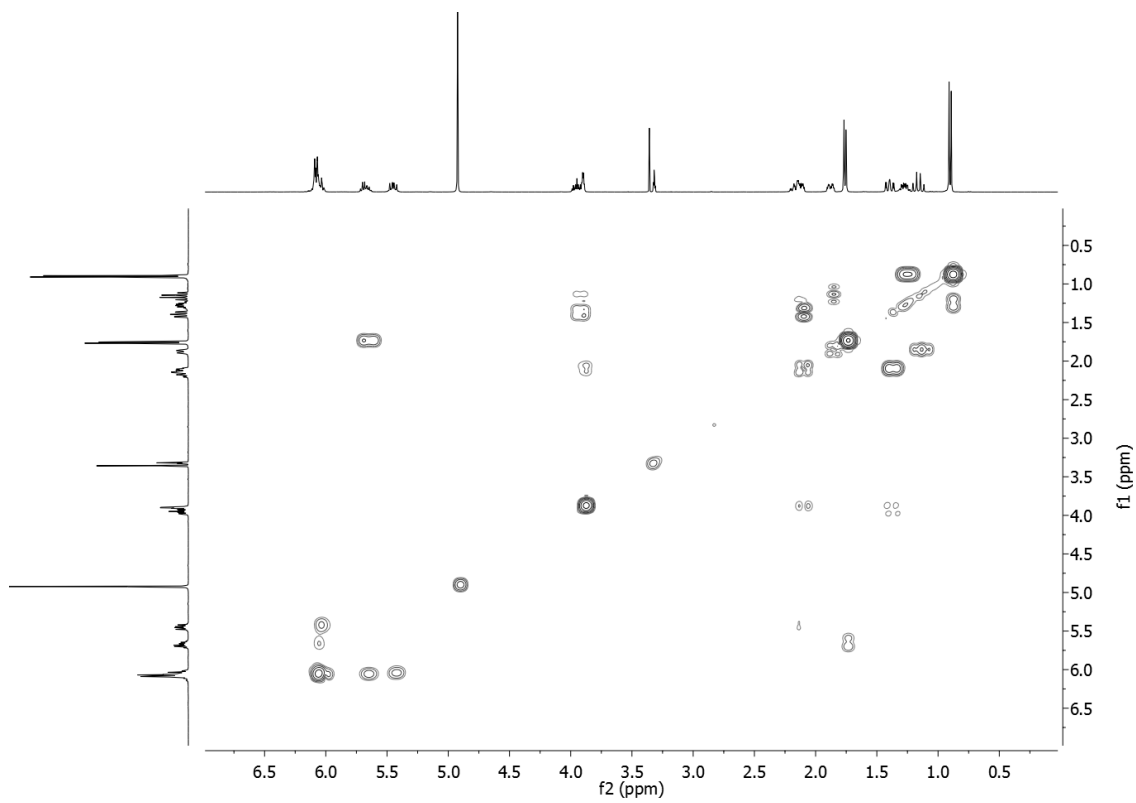

**Figure S37.** COSY-NMR spectrum (400 MHz, CD<sub>3</sub>OD) of waikialide B (**16**).

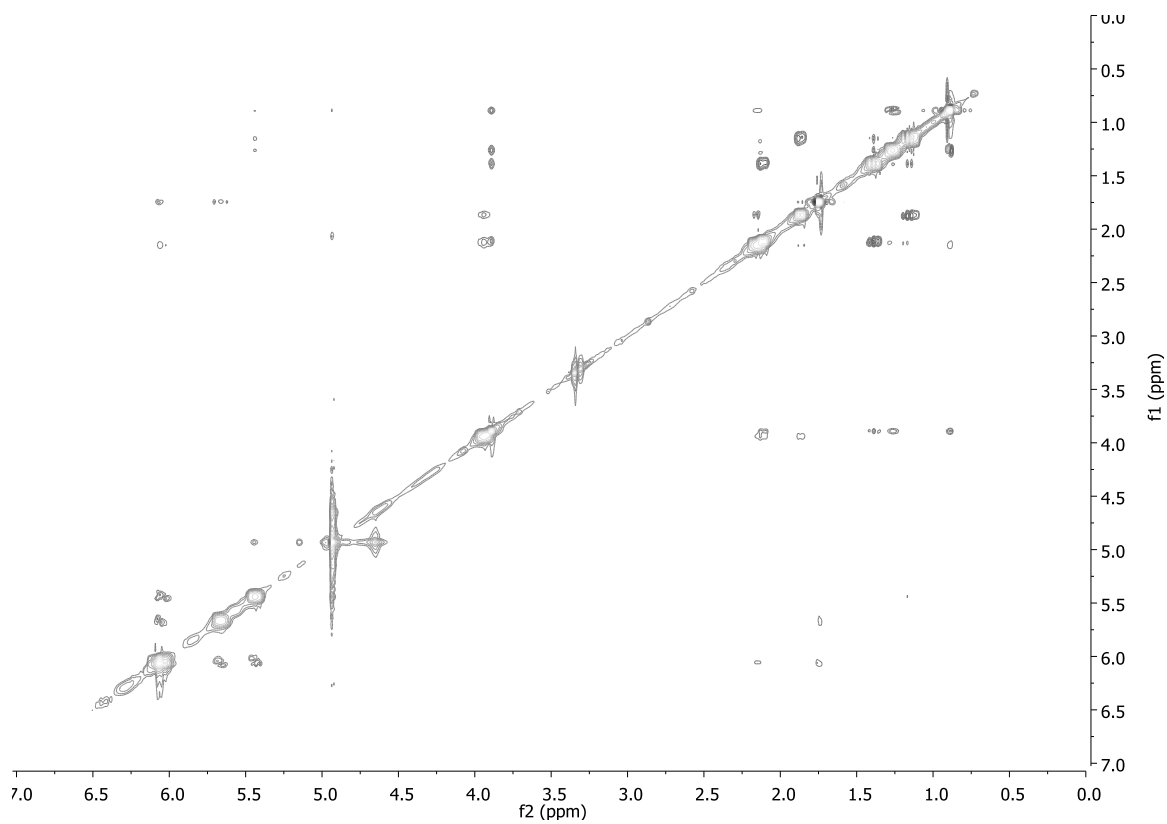

**Figure S38.** NOESY-NMR spectrum (400 MHz, CD<sub>3</sub>OD) of waikialide B (**16**).

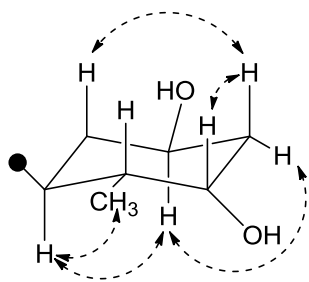

**Figure S39.**  $^1\text{H}$ - $^1\text{H}$  NOESY correlations (dashed double-headed arrows) used to corroborate the relative configuration of the substructure in metabolite **16**.



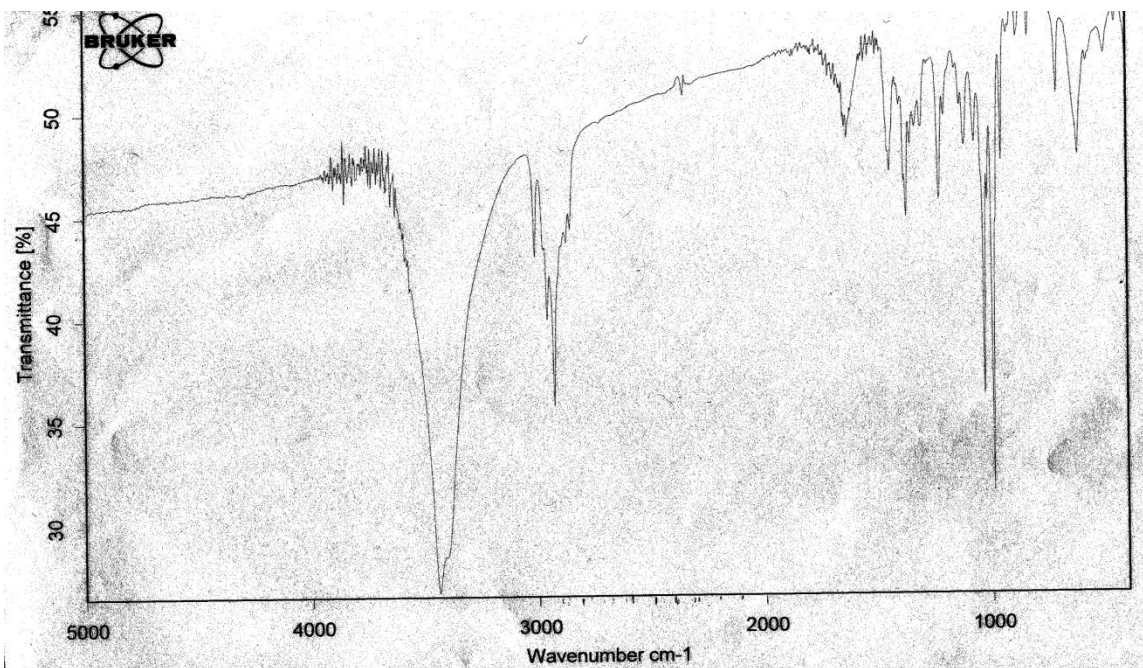

**Figure S40.** FTIR spectrum of waikialide B (16).

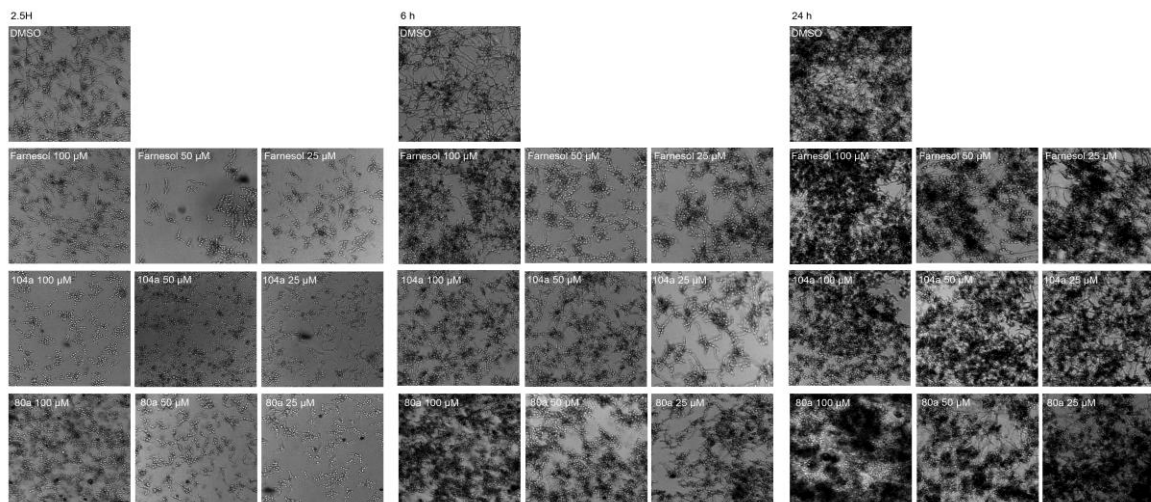

**Figure S41.** Effects of compounds **1** and **15** on *Candida albicans* hyphae formation. *C. albicans* DAY185 cells were treated with DMSO as negative control, farnesol as positive control, compound **1**, or compound **15**. Cell morphology was visualized at 2.5, 6 and 24 h using a phase contrast microscope (magnification,  $\times 200$ ).

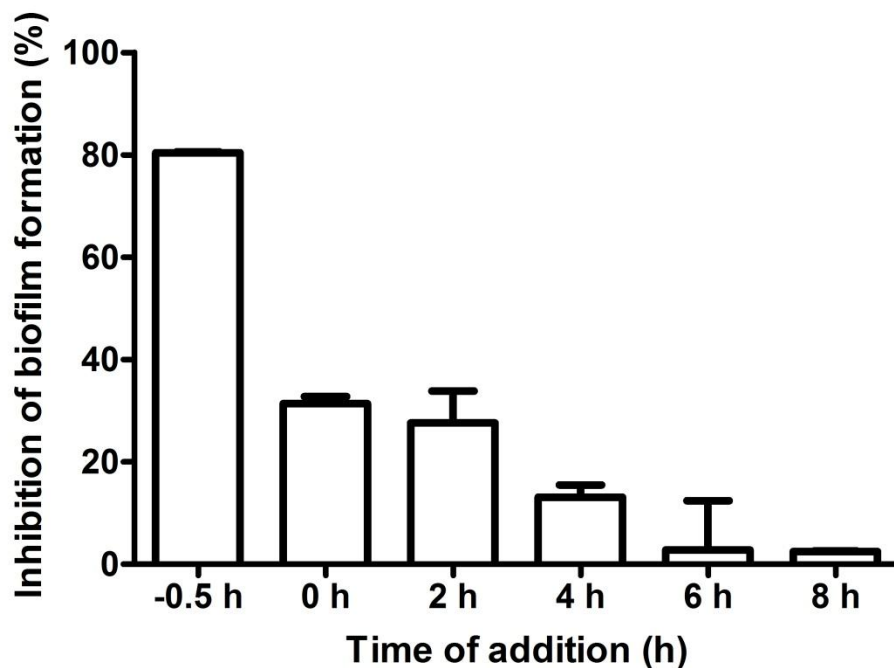

**Figure S42.** Time of addition assay for compound 1. Compound 1 (3  $\mu$ M) was added before (-0.5 h) or after (0, 2, 4, 6, and 8 h) seeding to *C. albicans* DAY185 culture in a 96-well microplate. At 48 h after seeding, the wells were washed twice with PBS and the amount of biofilm formation in the wells was determined using XTT assay. All experiments were performed in triplicate on three separate occasions.

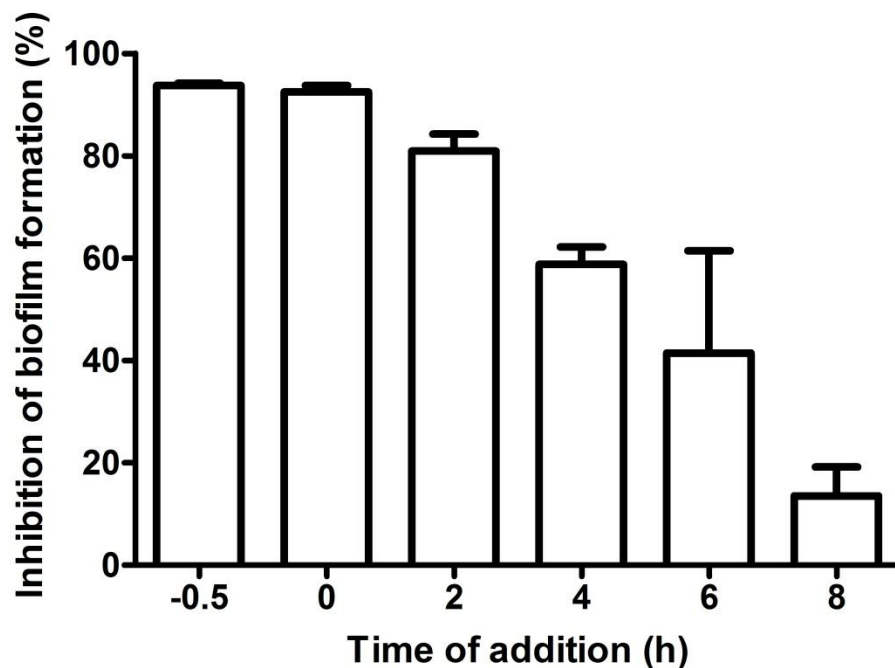

**Figure S43.** Time of addition assay for compound 1. Compound 1 (25  $\mu$ M) was added before (-0.5 h) or after (0, 2, 4, 6, and 8 h) seeding to *C. albicans* DAY185 culture in a 96-well microplate. At 48 h after seeding, the wells were washed twice with PBS and the amount of biofilm formation in the wells was determined using XTT assay. All experiments were performed in triplicate on three separate occasions.
